# Supplementary material for: Understanding nanoplastic toxicity and their interaction with engineered cationic nanopolymers in microalgae by physiological and proteomic approaches
Source: Royal Society of Chemistry journal article supplement (doi:10.1039/d1en00284h), 2021-01-01
Supplement: d1en00284h1.pdf [file d1en00284h1.pdf]

# Understanding nanoplastics toxicity and their interaction with engineered cationic nanopolymers in microalgae by physiological and proteomic approaches

Miguel Tamayo-Belda<sup>a</sup>, Juan José Vargas-Guerrero<sup>a</sup>, Keila Martin-Betancor<sup>a</sup>, Gerardo Pulido-Reyes<sup>a</sup>, Miguel González-Pleiter<sup>a</sup>, Francisco Leganés<sup>a</sup>, Roberto Rosal<sup>b</sup> and Francisca Fernández-Piñas<sup>a\*</sup>

<sup>a</sup> Department of Biology, Faculty of Science, Universidad Autónoma de Madrid, E-28049, Madrid, Spain.  
E-mail: francisca.pina@uam.es

<sup>b</sup> Department of Chemical Engineering, Universidad de Alcalá, E-28871 Alcalá de Henares, Madrid, Spain

\*Corresponding author. Email: francisca.pina@uam.es

## Proteomic analysis

### *In-Gel Digestion (Stacking gel)*

The protein extracts from three independent replicates of *Anabaena* exposed to PS-NPs, G7 and their binary mixture for 72h plus the control non-exposed cyanobacterial cells were suspended in a volume up to 50  $\mu$ l of sample buffer, and then applied onto 1.2 cm wide wells of a conventional SDS-PAGE gel (0.75 mm thick, 4% stacking, and 10% resolving). The run was stopped as soon as the front entered 3 mm into the resolving gel, so that the whole proteome became concentrated in the stacking/resolving gel interface. The unseparated protein bands were visualized by Coomassie staining, excised, cut into cubes (2 x 2 mm), and placed in 0.5 ml microcentrifuge tubes.<sup>1</sup> The gel pieces were destained in acetonitrile:water (ACN:H<sub>2</sub>O, 1:1), reduced and alkylated (disulfide bonds from cysteinyl residues were reduced with 10 mM DTT for 1 h at 56 °C, and then thiol groups were alkylated with 10 mM iodoacetamide for 30 min at room temperature in darkness) and digested *in situ* with sequencing-grade trypsin (Promega, Madison, WI) as described by Shevchenko et al.<sup>2</sup> with minor modifications. The gel pieces were dehydrated by removing all liquid using sufficient ACN. Acetonitrile was pipetted out and the gel pieces were dried in a speedvac. The dried gel pieces were re-hydrated in 100 mM Tris-HCl pH 8, 10mM CaCl<sub>2</sub> with 60 ng/ $\mu$ l trypsin at 5:1 protein:enzyme (w/w) ratio. The tubes were kept on ice for 2 h and incubated at 37 °C for 12 h. Digestion was stopped by the addition of 1% trifluoroacetic acid (TFA). Whole supernatants were dried and desalted onto OMIX Pipette tips C18 (Agilent Technologies) prior to mass spectrometric analysis.

### *TMT labeling and high pH fractionation*

The resultant peptide mixture from desalted protein tryptic digest (50  $\mu$ g) was labeled using chemicals from the TMT six plex Isobaric Mass Tagging Kit (Thermo Fisher Scientific, MA, USA) (Reagents 126 for the Control sample, 128 for the 65 sample, 130 for the 45 sample and 131 for the Mix sample) essentially as described by manufacturer. Briefly, peptides were dissolved in 50  $\mu$ L of 100 mM triethylammonium bicarbonate (TEAB), adjusted to pH 8. For labeling, each TMT reagent was dissolved in 41  $\mu$ L of ACN and added to the respective peptide mixture and then incubated at room temperature for one hour. Labelling was stopped by the addition of 8  $\mu$ L 5% hydroxylamine. Whole supernatants were

dried and the four samples were mixed to obtain the “4plex-labeled mixture”. The mixture was analyzed by RP-LC-MS/MS to check the efficiency of the labelling.<sup>3</sup>

### *Fractionation*

The sample was then fractionated using the Pierce High pH Reversed-Phase Peptide Fractionation Kit (Thermo Fisher Scientific, MA, USA), as described with minor modifications. The sample was re-hydrated in 0.1% TFA and then loaded onto an equilibrated, high-pH, reversed-phase fractionation spin column. A step gradient of increasing ACN concentrations (5-80%) in a volatile high-pH (Triethylamine (0.1%)) is then applied to the columns to elute bound peptides into nine different fractions collected by centrifugation. The fractions obtained from high-pH, reversed-phase 4plex-labeled mixture were dried and stored until analysis by mass spectrometry for quantification.

### *Quantitative analysis by reverse phase-liquid chromatography RP-LC-MS/MS*

The fractions were resuspended in 10 µl of 0.1% formic acid and analyzed by RP-LC-MS/MS in an Easy-nLC II system coupled to an ion trap LTQ-Orbitrap-Velos-Pro hybrid mass spectrometer (Thermo Scientific). The peptides were concentrated (on-line) by reverse phase chromatography using a 0.1mm × 20 mm C18 RP precolumn (Proxeon), and then separated using a 0.075mm x 250 mm C18 RP column (Proxeon) operating at 0.3 µl/min. Peptides were eluted using a 90-min dual gradient. The gradient profile was set as follows: 5–25% solvent B for 68 min, 25–40% solvent B for 22min, 40–100% solvent B for 2 min and 100% solvent B for 18 min (Solvent A: 0,1% formic acid in water, solvent B: 0,1% formic acid, 80% ACN in water). ESI ionization was done using a Nano-bore emitters Stainless Steel ID 30 µm (Proxeon) interface at 2.1 kV spray voltage with S-Lens of 60%.

The instrument method consisted of a data-dependent top-20 experiment with an Orbitrap MS1 scan at a resolution ( $m/\Delta m$ ) of 30,000 followed by either twenty high energy collision dissociation (HCD) MS/MS mass-analyzed in the Orbitrap at 7,500 ( $\Delta m/m$ ) resolution. MS2 experiments were performed using HCD to generate high resolution and high mass accuracy MS2 spectra.

The minimum MS signal for triggering MS/MS was set to 500. The lock mass option was enabled for both MS and MS/MS mode and the polydimethylcyclosiloxane ions (protonated  $(\text{Si}(\text{CH}_3)_2\text{O})_6$ ;  $m/z$  445.120025) were used for internal recalibration of the mass spectra.

Peptides were detected in survey scans from 400 to 1600 amu (1 µscan) using an isolation width of 1.3 u (in mass-to-charge ratio units), normalized collision energy of 40% for HCD fragmentation, and dynamic exclusion applied during 60 seconds periods. Charge-state screening was enabled to reject unassigned and singly charged protonated ions.<sup>4</sup>

### *Quantitative data analysis*

Peptide identification from raw data (a single search was performed with all nine raws from the fractionation) was carried out using PEAKS Studio X+ search engine (Bioinformatics Solutions Inc., Waterloo, Ontario, Canada). Database searches were performed against uniprot-*Nostoc (Anabaena)* sp. PCC 7120 (6070 entries; UniProt release 12/2019) (decoy-fusion database). The following constraints were used for the searches: tryptic cleavage after Arg and Lys (semi-specific), up to two missed cleavage sites, and tolerances of 20 ppm for precursor ions and 0.05 Da for MS/MS fragment ions and the searches

were performed allowing optional Met oxidation and Cys carbamidomethylation and fixed TMT 6plex reagent labeling at the N-terminus and lysine residues. False discovery rates (FDR) for peptide spectrum matches (PSM) was limited to 0.01. Only those proteins with at least two distinct peptides and at least one unique peptide being discovered from LC/MS/MS analyses were considered reliably identified and sent to be quantified.

Quantitation of TMT labeled peptides was performed with PEAKS Studio X+ search engine, selected “Reporter Ion Quantification TMT” under the “Quantifications” options. Auto normalization mode was used that calculates a global ratio from the total intensity of all labels in all quantifiable peptides. The -10LgP, Quality and Reporter Ion Intensity (1.7e4) were used for Spectrum filter and Significance (20, PEAKSQ method) was used for peptide and protein abundance calculation. For the Protein quantification, protein groups for peptide uniqueness were considered, using only unique peptides for protein quantification and the modified peptides were excluded.<sup>3,5</sup>

**Table S1:** Data displayed by STRING MCL clustering (inflation parameter = 3)

| Cluster number | cluster color | Gene count | Protein name | Protein identifier |
|----------------|---------------|------------|--------------|--------------------|
| 1              | Red           | 12         | FusA         | 103690.1713        |
| 1              | Red           | 12         | SecA         | 103690.1713        |
| 1              | Red           | 12         | Rps7         | 103690.1713        |
| 1              | Red           | 12         | Rps4         | 103690.1713        |
| 1              | Red           | 12         | Rps5         | 103690.1713        |
| 1              | Red           | 12         | RpsN         | 103690.1713        |
| 1              | Red           | 12         | Hpf          | 103690.1713        |
| 1              | Red           | 12         | DapB         | 103690.1713        |
| 1              | Red           | 12         | RpoC2        | 103690.1714        |
| 1              | Red           | 12         | Rpl1         | 103690.1713        |
| 1              | Red           | 12         | RplN         | 103690.1713        |
| 1              | Red           | 12         | RpoB         | 103690.1714        |
| 2              | Lime Green    | 9          | DnaK2        | 103690.1713        |
| 2              | Lime Green    | 9          | ClpP3        | 103690.1713        |
| 2              | Lime Green    | 9          | Alr0286      | 103690.1714        |
| 2              | Lime Green    | 9          | GroL2        | 103690.1713        |
| 2              | Lime Green    | 9          | ClpB2        | 103690.1713        |
| 2              | Lime Green    | 9          | Alr1809      | 103690.1713        |
| 2              | Lime Green    | 9          | Alr2323      | 103690.1713        |
| 2              | Lime Green    | 9          | GroL1        | 103690.1713        |
| 2              | Lime Green    | 9          | 17132093     | 103690.1713        |
| 3              | Cyan          | 5          | Alr4642      | 103690.1713        |
| 3              | Cyan          | 5          | All0737      | 103690.1713        |
| 3              | Cyan          | 5          | All1541      | 103690.1714        |

|    |                   |   |         |             |
|----|-------------------|---|---------|-------------|
| 3  | Cyan              | 5 | Alr4641 | 103690.1713 |
| 3  | Cyan              | 5 | Alr4745 | 103690.1713 |
| 4  | Medium Purple     | 5 | PecA    | 103690.1713 |
| 4  | Medium Purple     | 5 | CpcG3   | 103690.1713 |
| 4  | Medium Purple     | 5 | PecC    | 103690.1713 |
| 4  | Medium Purple     | 5 | ApcE    | 103690.1713 |
| 4  | Medium Purple     | 5 | PecB    | 103690.1713 |
| 5  | Medium Purple (2) | 4 | NdhI    | 103690.1714 |
| 5  | Medium Purple (2) | 4 | PsbB    | 103690.1714 |
| 5  | Medium Purple (2) | 4 | Alr1129 | 103690.1713 |
| 5  | Medium Purple (2) | 4 | All0107 | 103690.1714 |
| 6  | Orchid            | 2 | Alr0668 | 103690.1713 |
| 6  | Orchid            | 2 | Alr0669 | 103690.1713 |
| 7  | Purple            | 2 | All1267 | 103690.1713 |
| 7  | Purple            | 2 | Alr0782 | 103690.1713 |
| 8  | Pink              | 2 | All0667 | 103690.1713 |
| 8  | Pink              | 2 | All0666 | 103690.1713 |
| 9  | Pale Violet Red   | 2 | PepA    | 103690.1714 |
| 9  | Pale Violet Red   | 2 | Ndk     | 103690.1713 |
| 10 | Brown             | 2 | Alr3411 | 103690.1713 |
| 10 | Brown             | 2 | Alr1548 | 103690.1714 |
| 11 | Dark Golden Rod   | 2 | Alr4029 | 103690.1713 |
| 11 | Dark Golden Rod   | 2 | Alr4028 | 103690.1713 |
| 12 | Yellow            | 2 | Alr2117 | 103690.1713 |
| 12 | Yellow            | 2 | All3054 | 103690.1713 |
| 13 | Olive             | 2 | Alr0490 | 103690.1713 |
| 13 | Olive             | 2 | All2127 | 103690.1713 |
| 14 | Green Yellow      | 1 | All4499 | 103690.1713 |
| 15 | Green             | 1 | Alr2269 | 103690.1713 |
| 16 | Light Green       | 1 | GlnA    | 103690.1713 |

**Table S2:** Particle hydrodynamic size, based on volume distribution, determined by DLS and  $\zeta$ -potential measured by ELS in pure water and in culture medium (AA/8 + N) with their 95% confidence intervals.

|                       | Size (nm)           |                   | $\zeta$ -Potential (mV) |
|-----------------------|---------------------|-------------------|-------------------------|
|                       | Pure water (pH 6.5) | AA/8 + N (pH 7.4) | AA/8 + N (pH 7.4)       |
| Without nanoparticles | --                  | 1.8 $\pm$ 1.1     | -19.4 $\pm$ 1.6         |
| PS-NPs                | 23.8 $\pm$ 0.6      | 24.9 $\pm$ 1.1    | -19.8 $\pm$ 0.7         |
| G7*                   | 7.6 $\pm$ 0.3*      | 10.1 $\pm$ 1.1*   | 20.8 $\pm$ 1.1*         |
| Mix                   | 27.3 $\pm$ 3.3      | 527.1 $\pm$ 69.4  | -17.0 $\pm$ 0.9         |

\* In agreement with Tamayo-Belda *et al.* after filtration through a 100 nm filter.<sup>55</sup>

**Table S3:** Effective concentrations of polystyrene nanoplastics (PS-NPs) both individually and in mixture with PAMAM dendrimers of generation 7 (Mix) that induced 10%, 50% and 90% of growth inhibition, chlorophyll *a* and phycocyanin concentration decrease and the model type fitted on *Anabaena* sp. PCC7120 for 72 h.

| Measured parameter                     | Model Fitted (PS-NPs / Mix) | Effective concentration | PS-NPs (mg/mL)   | Mix (Constant ratio dilutions) |
|----------------------------------------|-----------------------------|-------------------------|------------------|--------------------------------|
| <b>Growth</b><br>(mg of dry weight/mL) | W1.3 / W1.4                 | EC <sub>10</sub>        | 46.12 $\pm$ 2.08 | 0.59 $\pm$ 0.06                |
|                                        |                             | EC <sub>50</sub>        | 64.40 $\pm$ 0.90 | 1.39 $\pm$ 0.06                |
|                                        |                             | EC <sub>90</sub>        | 81.26 $\pm$ 3.29 | 3.25 $\pm$ 0.13                |
| <b>Chlorophyll <i>a</i></b><br>(mg/mL) | LL.2 / W1.3                 | EC <sub>10</sub>        | 40.51 $\pm$ 1.21 | 0.56 $\pm$ 0.09                |
|                                        |                             | EC <sub>50</sub>        | 59.35 $\pm$ 0.65 | 1.22 $\pm$ 0.07                |
|                                        |                             | EC <sub>90</sub>        | 75.71 $\pm$ 1.25 | 1.99 $\pm$ 0.16                |
| <b>Phycocyanin</b><br>(mg/mL)          | LL.5 / W2.3                 | EC <sub>10</sub>        | 40.03 $\pm$ 2.36 | 0.94 $\pm$ 0.19                |
|                                        |                             | EC <sub>50</sub>        | 59.47 $\pm$ 1.17 | 1.47 $\pm$ 0.18                |
|                                        |                             | EC <sub>90</sub>        | 76.53 $\pm$ 2.15 | 2.31 $\pm$ 0.43                |

**Table S4:** Surface and volume related properties of polystyrene nanoplastics (PS-NPs), PAMAM dendrimers of generation 7 (G7) and their mixture (Mix) in AA/8+N.

| Particle/Combo                                         | PS-NPs   | G7       | Mix                        |
|--------------------------------------------------------|----------|----------|----------------------------|
| Radius (nm)                                            | 12       | 4        | 264                        |
| Surface area (nm <sup>2</sup> )                        | 1.81E+03 | 2.01E+02 | 8.76E+05                   |
| Volume (nm <sup>3</sup> )                              | 7.24E+03 | 2.68E+02 | 7.71E+07                   |
| Surf. area/Volume                                      | 0.250    | 0.750    | 0.011                      |
| Concentration (µg mL <sup>-1</sup> )                   | 64.4     | 3.9      | 64.4 (PS-NPs)<br>3.92 (G7) |
| Concentration (particle number mL <sup>-1</sup> )      | 6.89E+12 | 1.96E+13 | 7.15E+08                   |
| Total Surface area (nm <sup>2</sup> mL <sup>-1</sup> ) | 1.25E+16 | 3.94E+15 | 6.27E+14                   |
| Total Volume (nm <sup>3</sup> mL <sup>-1</sup> )       | 4.99E+16 | 5.25E+15 | 5.51E+16                   |
| Total Surf. area/Volume                                | 0.250    | 0.750    | 0.011                      |

**Table S5:** Protein description data from Uniprot

| Category         | Gene     | Accession | Length | Protein names & description                                                                                                                                                                                                                                                                                                                                                                                                                                                                                                                                                                                                                                                                                                                |
|------------------|----------|-----------|--------|--------------------------------------------------------------------------------------------------------------------------------------------------------------------------------------------------------------------------------------------------------------------------------------------------------------------------------------------------------------------------------------------------------------------------------------------------------------------------------------------------------------------------------------------------------------------------------------------------------------------------------------------------------------------------------------------------------------------------------------------|
| Oxidative stress | all0737* | Q8YYV6    | 483    | Thioredoxin reductase (EC 1.8.1.9); Biological process: cell redox homeostasis [GO:0045454]; removal of superoxide radicals [GO:0019430]; Cellular component: cell [GO:0005623]; cytoplasm [GO:0005737]; Associated terms: cell [GO:0005623]; cytoplasm [GO:0005737]; thioredoxin-disulfide reductase activity [GO:0004791]; cell redox homeostasis [GO:0045454]; removal of superoxide radicals [GO:0019430]; Molecular function: thioredoxin-disulfide reductase activity [GO:0004791]; Domain features: DOMAIN 339-483; note="Thioredoxin"; evidence="ECO:0000259 PROSITE:PS51352";<br>Keywords: FAD; Flavoprotein; Oxidoreductase; Redox-active center; Protein families: Class-II pyridine nucleotide-disulfide oxidoreductase family |
|                  | all1541* | Q8YWR3    | 251    | Peroxiredoxin 2 family protein/glutaredoxin Biological process: cell redox homeostasis [GO:0045454]; Cellular component: cell [GO:0005623]; Associated terms: cell [GO:0005623]; electron transfer activity [GO:0009055]; protein disulfide oxidoreductase activity [GO:0015035]; cell redox homeostasis [GO:0045454]; Molecular function: electron transfer activity [GO:0009055]; protein disulfide oxidoreductase activity [GO:0015035]; Domain features: DOMAIN 4-168; note="Thioredoxin"; evidence="ECO:0000259 PROSITE:PS51352"                                                                                                                                                                                                      |

|          |        |     |                                                                                                                                                                                                                                                                                                                                                                                                                                                                                                                                                                                                                                                                                                                                                                                                                                                                                  |
|----------|--------|-----|----------------------------------------------------------------------------------------------------------------------------------------------------------------------------------------------------------------------------------------------------------------------------------------------------------------------------------------------------------------------------------------------------------------------------------------------------------------------------------------------------------------------------------------------------------------------------------------------------------------------------------------------------------------------------------------------------------------------------------------------------------------------------------------------------------------------------------------------------------------------------------|
| alr0672* | Q8YZ15 | 433 | Alr0672 protein; Molecular function: peroxidase activity; <sup>6</sup> Domain features: DOMAIN 273-418; note="acidPPc"; evidence="ECO:0000259 Pfam:PF01569"                                                                                                                                                                                                                                                                                                                                                                                                                                                                                                                                                                                                                                                                                                                      |
| alr4641* | Q8YNC5 | 203 | Peroxiredoxin ; Biological process: cell redox homeostasis [GO:0045454]; Cellular component: cell [GO:0005623]; Associated terms: cell [GO:0005623]; peroxiredoxin activity [GO:0051920]; cell redox homeostasis [GO:0045454]; Molecular function: peroxiredoxin activity [GO:0051920]; Domain features: DOMAIN 11-169; note="Thioredoxin"; evidence="ECO:0000259 PROSITE:PS51352"                                                                                                                                                                                                                                                                                                                                                                                                                                                                                               |
| alr4642  | Q8YNC4 | 213 | Alr4642 protein ; Biological process: cell redox homeostasis [GO:0045454]; Cellular component: cell [GO:0005623]; Associated terms: cell [GO:0005623]; antioxidant activity [GO:0016209]; oxidoreductase activity [GO:0016491]; cell redox homeostasis [GO:0045454]; Molecular function: antioxidant activity [GO:0016209]; oxidoreductase activity [GO:0016491]; Domain features: DOMAIN 63-213; note="Thioredoxin"; evidence="ECO:0000259 PROSITE:PS51352"                                                                                                                                                                                                                                                                                                                                                                                                                     |
| alr4745  | Q8YN25 | 475 | Dihydrolipoyl dehydrogenase (EC 1.8.1.4) ; Biological process: cell redox homeostasis [GO:0045454]; Cellular component: cell [GO:0005623]; Associated terms: cell [GO:0005623]; dihydrolipoyl dehydrogenase activity [GO:0004148]; electron transfer activity [GO:0009055]; flavin adenine dinucleotide binding [GO:0050660]; cell redox homeostasis [GO:0045454]; Molecular function: dihydrolipoyl dehydrogenase activity [GO:0004148]; electron transfer activity [GO:0009055]; flavin adenine dinucleotide binding [GO:0050660]; Domain features: DOMAIN 7-338; note="Pyr_redox_2"; evidence="ECO:0000259 Pfam:PF07992"; DOMAIN 357-469; note="Pyr_redox_dim"; evidence="ECO:0000259 Pfam:PF02852"; Keywords: FAD; Flavoprotein; NAD; Nucleotide-binding; Oxidoreductase; Redox-active center; Protein families: Class-I pyridine nucleotide-disulfide oxidoreductase family |
| alr7524  | Q8ZSI6 | 193 | Alr7524 protein; {ECO:0000250}; Associated terms: peroxiredoxin activity [GO:0051920]; Molecular function: peroxiredoxin activity [GO:0051920]; Domain features: DOMAIN 57-123; note="CMD"; evidence="ECO:0000259 Pfam:PF02627"; Keywords: Plasmid                                                                                                                                                                                                                                                                                                                                                                                                                                                                                                                                                                                                                               |
| dpsA*    | Q8YQL3 | 184 | Nutrient stress-induced DNA-binding protein; Function: Involved in protection of chromosomal DNA from damage under nutrient-limited and oxidative stress conditions.                                                                                                                                                                                                                                                                                                                                                                                                                                                                                                                                                                                                                                                                                                             |

|                 |         |        |     |                                                                                                                                                                                                                                                                                                                                                                                                                                                                                                                                                                        |
|-----------------|---------|--------|-----|------------------------------------------------------------------------------------------------------------------------------------------------------------------------------------------------------------------------------------------------------------------------------------------------------------------------------------------------------------------------------------------------------------------------------------------------------------------------------------------------------------------------------------------------------------------------|
|                 |         |        |     | Binds heme (By similarity); Biological process: cellular iron ion homeostasis [GO:0006879]; Cellular component: cell [GO:0005623]; Associated terms: cell [GO:0005623]; DNA binding [GO:0003677]; ferric iron binding [GO:0008199]; oxidoreductase activity, oxidizing metal ions [GO:0016722]; cellular iron ion homeostasis [GO:0006879]; Molecular function: DNA binding [GO:0003677]; ferric iron binding [GO:0008199]; oxidoreductase activity, oxidizing metal ions [GO:0016722]; Keywords: DNA-binding; Heme; Iron; Metal-binding; Protein families: Dps family |
| Stress response | alr0286 | Q8Z017 | 150 | Small heat shock protein; Domain features: DOMAIN 33-146; note="SHSP"; evidence="ECO:0000259 PROSITE:PS01031" Keywords: Stress response; Protein families: Small heat shock protein (HSP20) family                                                                                                                                                                                                                                                                                                                                                                     |
|                 | alr1809 | Q8YW07 | 155 | Heat shock protein, class I; Domain features: DOMAIN 43-155; note="SHSP"; evidence="ECO:0000259 PROSITE:PS01031" Keywords: Stress response; Protein families: Small heat shock protein (HSP20) family                                                                                                                                                                                                                                                                                                                                                                  |
|                 | alr2323 | Q8YUL8 | 658 | Heat shock protein ; Biological process: protein folding [GO:0006457]; Associated terms: ATP binding [GO:0005524]; unfolded protein binding [GO:0051082]; protein folding [GO:0006457]; Molecular function: ATP binding [GO:0005524]; unfolded protein binding [GO:0051082]; Domain features: DOMAIN 25-178; note="HATPase_c"; evidence="ECO:0000259 SMART:SM00387" Keywords: Stress response                                                                                                                                                                          |
|                 | clpB    | Q8YST5 | 839 | Endopeptidase Clp ATP-binding chain; Subcellular location: Cytoplasm {ECO:0000305}; Biological process: protein metabolic process [GO:0019538]; Associated terms: ATP binding [GO:0005524]; protein metabolic process [GO:0019538]; Molecular function: ATP binding [GO:0005524]; Domain features: DOMAIN 432-467; note="UVR"; evidence="ECO:0000259 PROSITE:PS50151" Keywords: ATP-binding; Chaperone; Coiled coil; Nucleotide-binding; Repeat; Protein families: ClpA/ClpB family                                                                                    |
|                 | clpB2   | Q8YM56 | 872 | Chaperone protein ClpB 2; Function: Part of a stress-induced multi-chaperone system, it is involved in the recovery of the cell from heat-induced damage, in cooperation with DnaK, DnaJ and GrpE. Acts before DnaK, in the processing of protein aggregates. Protein binding stimulates the ATPase activity; ATP hydrolysis unfolds the                                                                                                                                                                                                                               |



|       |        |     |  |                                                                                                                                                                                                                                                                                                                                                                                                                                                                                                                                                                                                                                                                                                                                                                                                                                                                                                                                                                     |
|-------|--------|-----|--|---------------------------------------------------------------------------------------------------------------------------------------------------------------------------------------------------------------------------------------------------------------------------------------------------------------------------------------------------------------------------------------------------------------------------------------------------------------------------------------------------------------------------------------------------------------------------------------------------------------------------------------------------------------------------------------------------------------------------------------------------------------------------------------------------------------------------------------------------------------------------------------------------------------------------------------------------------------------|
|       |        |     |  | denatured protein aggregates, which probably helps expose new hydrophobic binding sites on the surface of ClpB-bound aggregates, contributing to the solubilization and refolding of denatured protein aggregates by DnaK (By similarity). {ECO:0000250}; Subcellular location: Cytoplasm {ECO:0000255 HAMAP-Rule:MF_00444}; Biological process: protein metabolic process [GO:0019538]; protein refolding [GO:0042026]; response to heat [GO:0009408]; Cellular component: cytoplasm [GO:0005737]; Associated terms: cytoplasm [GO:0005737]; ATP binding [GO:0005524]; protein metabolic process [GO:0019538]; protein refolding [GO:0042026]; response to heat [GO:0009408]; Molecular function: ATP binding [GO:0005524]; Domain features: DOMAIN 6-148; note="Clp R"; evidence="ECO:0000255 PROSITE-ProRule:PRU01251" Keywords: ATP-binding; Chaperone; Coiled coil; Cytoplasm; Nucleotide-binding; Repeat; Stress response; Protein families: ClpA/ClpB family |
| clpP3 | Q8YP43 | 197 |  | Probable ATP-dependent Clp protease proteolytic subunit 3 (EC 3.4.21.92) (Endopeptidase Clp 3) involved in the efficient protein homeostasis; <sup>7</sup> Function: Cleaves peptides in various proteins in a process that requires ATP hydrolysis. Has a chymotrypsin-like activity. Plays a major role in the degradation of misfolded proteins. {ECO:0000255 HAMAP-Rule:MF_00444}; Cellular component: cytoplasm [GO:0005737]; Associated terms: cytoplasm [GO:0005737]; serine-type endopeptidase activity [GO:0004252]; Molecular function: serine-type endopeptidase activity [GO:0004252]; Keywords: Cytoplasm; Hydrolase; Protease; Serine protease; Protein families: Peptidase S14 family                                                                                                                                                                                                                                                                |
| dnaK2 | Q8YW74 | 633 |  | Chaperone protein dnaK2 (HSP70-2) (Heat shock 70 kDa protein 2) (Heat shock protein 70-2); Function: Acts as a chaperone. {ECO:0000250}; Subcellular location: Cytoplasm {ECO:0000255 HAMAP-Rule:MF_00600}; Biological process: protein folding [GO:0006457]; Associated terms: ATP binding [GO:0005524]; unfolded protein binding [GO:0051082]; protein folding [GO:0006457]; Molecular function: ATP binding [GO:0005524]; unfolded protein binding [GO:0051082]; Keywords: ATP-binding; Chaperone; Nucleotide-binding; Phosphoprotein; Stress response; Protein families: Heat shock protein 70 family                                                                                                                                                                                                                                                                                                                                                           |
| groL1 | Q8YQZ8 | 544 |  | 60 kDa chaperonin 1 (GroEL protein 1) (Protein Cpn60 1); Function: Prevents misfolding and promotes the refolding                                                                                                                                                                                                                                                                                                                                                                                                                                                                                                                                                                                                                                                                                                                                                                                                                                                   |

|                  |          |        |      |                                                                                                                                                                                                                                                                                                                                                                                                                                                                                                                                                                                                                                                                                   |
|------------------|----------|--------|------|-----------------------------------------------------------------------------------------------------------------------------------------------------------------------------------------------------------------------------------------------------------------------------------------------------------------------------------------------------------------------------------------------------------------------------------------------------------------------------------------------------------------------------------------------------------------------------------------------------------------------------------------------------------------------------------|
|                  |          |        |      | and proper assembly of unfolded polypeptides generated under stress conditions. {ECO:0000255 HAMAP-Rule:MF_00600}; Subcellular location: Cytoplasm {ECO:0000255 HAMAP-Rule:MF_00600}; Biological process: protein refolding [GO:0042026]; Cellular component: cytoplasm [GO:0005737]; Associated terms: cytoplasm [GO:0005737]; ATP binding [GO:0005524]; unfolded protein binding [GO:0051082]; protein refolding [GO:0042026]; Molecular function: ATP binding [GO:0005524]; unfolded protein binding [GO:0051082]; Keywords: ATP-binding; Chaperone; Cytoplasm; Nucleotide-binding; Protein families: Chaperonin (HSP60) family                                                |
|                  | groL2    | Q8YVS8 | 560  | 60 kDa chaperonin 2 (GroEL protein 2) (Protein Cpn60 2); Function: Prevents misfolding and promotes the refolding and proper assembly of unfolded polypeptides generated under stress conditions. {ECO:0000255 HAMAP-Rule:MF_00600}; Biological process: protein refolding [GO:0042026]; Cellular component: cytoplasm [GO:0005737]; Associated terms: cytoplasm [GO:0005737]; ATP binding [GO:0005524]; unfolded protein binding [GO:0051082]; protein refolding [GO:0042026]; Molecular function: ATP binding [GO:0005524]; unfolded protein binding [GO:0051082]; Keywords: ATP-binding; Chaperone; Cytoplasm; Nucleotide-binding; Protein families: Chaperonin (HSP60) family |
| Surface location | alr1540* | Q8YWR4 | 128  | Alr1540 protein; Transmembrane; Domain features: DOMAIN 22-77; note="PG_binding_1"; evidence="ECO:0000259 Pfam:PF01471"                                                                                                                                                                                                                                                                                                                                                                                                                                                                                                                                                           |
|                  | all0767  | Q8YYS9 | 185  | All0767 protein; Cellular component: integral component of membrane [GO:0016021]; Associated terms: integral component of membrane [GO:0016021]; Keywords: Membrane; Transmembrane; Transmembrane helix                                                                                                                                                                                                                                                                                                                                                                                                                                                                           |
|                  | all2358  | Q8YUI8 | 326  | Phosphonate ABC transport phosphonate binding component; Transmembrane; Biological process: transmembrane transport [GO:0055085]; Cellular component: ATP-binding cassette (ABC) transporter complex [GO:0043190]; Associated terms: ATP-binding cassette (ABC) transporter complex [GO:0043190]; transmembrane transport [GO:0055085]                                                                                                                                                                                                                                                                                                                                            |
|                  | all3054  | Q8YSN0 | 1038 | All3054 protein; Transmembrane; ; Cellular component: integral component of membrane [GO:0016021]; Associated terms: integral component of membrane [GO:0016021]; Domain features: DOMAIN 54-281; note="PBP_domain";                                                                                                                                                                                                                                                                                                                                                                                                                                                              |

|          |        |     |                                                                                                                                                                                                                                                                                                                                                                                                                                                                                                                                                                                                                                                                                                                       |
|----------|--------|-----|-----------------------------------------------------------------------------------------------------------------------------------------------------------------------------------------------------------------------------------------------------------------------------------------------------------------------------------------------------------------------------------------------------------------------------------------------------------------------------------------------------------------------------------------------------------------------------------------------------------------------------------------------------------------------------------------------------------------------|
|          |        |     | evidence="ECO:0000259 Pfam:PF12849" Keywords: Membrane; Transmembrane; Transmembrane helix                                                                                                                                                                                                                                                                                                                                                                                                                                                                                                                                                                                                                            |
| all7121* | Q8YL17 | 694 | All7121 protein; Cellular component: integral component of membrane [GO:0016021]; Associated terms: integral component of membrane [GO:0016021]; electron transfer activity [GO:0009055]; heme binding [GO:0020037]; metal ion binding [GO:0046872]; Molecular function: electron transfer activity [GO:0009055]; heme binding [GO:0020037]; metal ion binding [GO:0046872]; Domain features: DOMAIN 163-351; note="Cytochrome c"; evidence="ECO:0000259 PROSITE:PS51007"; DOMAIN 473-649; note="Cytochrome c"; evidence="ECO:0000259 PROSITE:PS51007" Keywords: Heme; Iron; Membrane; Metal-binding; Plasmid; Transmembrane; Transmembrane helix                                                                     |
| alr0140  | Q8Z0F7 | 552 | Periplasmic oligopeptide-binding protein of oligopeptide ABC transporter; Subcellular location: Cell outer membrane {ECO:0000256 RuleBase:RU003357, ECO:0000256 SAAS:SAAS01009251}; Biological process: transmembrane transport [GO:0055085]; Cellular component: ATP-binding cassette (ABC) transporter complex [GO:0043190]; Associated terms: ATP-binding cassette (ABC) transporter complex [GO:0043190]; transmembrane transport [GO:0055085]; Domain features: DOMAIN 96-459; note="SBP_bac_5"; evidence="ECO:0000259 Pfam:PF00496"                                                                                                                                                                             |
| alr0397* | Q8YZR0 | 867 | Alr0397 protein; Cellular component: cell outer membrane [GO:0009279]; Associated terms: cell outer membrane [GO:0009279]; siderophore uptake transmembrane transporter activity [GO:0015344]; signaling receptor activity [GO:0038023]; Molecular function: siderophore uptake transmembrane transporter activity [GO:0015344]; signaling receptor activity [GO:0038023]; Domain features: DOMAIN 71-167; note="AMIN"; evidence="ECO:0000259 Pfam:PF11741"; DOMAIN 199-301; note="Plug"; evidence="ECO:0000259 Pfam:PF07715"; DOMAIN 400-865; note="TonB_dep_Rec"; evidence="ECO:0000259 Pfam:PF00593" Keywords: Cell outer membrane; Membrane; Receptor; TonB box; Protein families: TonB-dependent receptor family |
| alr0474* | Q8YZI6 | 596 | Alr0474 protein                                                                                                                                                                                                                                                                                                                                                                                                                                                                                                                                                                                                                                                                                                       |
| alr0564  | Q8YZB5 | 397 | Alr0564 protein ; Biological process: peptidoglycan turnover [GO:0009254]; Cellular component: outer membrane [GO:0019867]; Associated terms: outer                                                                                                                                                                                                                                                                                                                                                                                                                                                                                                                                                                   |

|         |        |     |                                                                                                                                                                                                                                                                                                                                                                                                                                                                               |
|---------|--------|-----|-------------------------------------------------------------------------------------------------------------------------------------------------------------------------------------------------------------------------------------------------------------------------------------------------------------------------------------------------------------------------------------------------------------------------------------------------------------------------------|
|         |        |     | membrane [GO:0019867]; hydrolase activity, hydrolyzing O-glycosyl compounds [GO:0004553]; peptidoglycan turnover [GO:0009254]; Molecular function: hydrolase activity, hydrolyzing O-glycosyl compounds [GO:0004553]; Domain features: DOMAIN 154-295; note="MltA"; evidence="ECO:0000259 SMART:SM00925" Keywords: Signal                                                                                                                                                     |
| all4499 | Q8YNR3 | 546 | All4499 protein ; Biological process: carbohydrate transport [GO:0008643]; Cellular component: integral component of membrane [GO:0016021]; Associated terms: integral component of membrane [GO:0016021]; porin activity [GO:0015288]; carbohydrate transport [GO:0008643]; Molecular function: porin activity [GO:0015288]; Domain features: DOMAIN 55-119; note="SLH"; evidence="ECO:0000259 PROSITE:PS51272" Keywords: Coiled coil; Signal; Protein families: OprB family |
| alr3411 | Q8YRN3 | 190 | Alr3411 protein; Identify in the outer membrane fraction. <sup>8</sup>                                                                                                                                                                                                                                                                                                                                                                                                        |
| alr0880 | Q8YYH0 | 702 | Oligopeptidase A; Transmembrane; Associated terms: metal ion binding [GO:0046872]; metalloendopeptidase activity [GO:0004222]; Molecular function: metal ion binding [GO:0046872]; metalloendopeptidase activity [GO:0004222]; Domain features: DOMAIN 235-696; note="Peptidase_M3"; evidence="ECO:0000259 Pfam:PF01432" Keywords: Coiled coil; Hydrolase; Metal-binding; Metalloprotease; Protease; Zinc; Protein families: Peptidase M3 family                              |
| alr2117 | Q8YV64 | 603 | Alr2117 protein; Cellular component: integral component of membrane [GO:0016021]; Associated terms: integral component of membrane [GO:0016021]; Keywords: Coiled coil; Membrane; Transmembrane; Transmembrane helix                                                                                                                                                                                                                                                          |
| alr2269 | Q8YUR6 | 833 | Alr2269 protein; Cellular component: outer membrane [GO:0019867]; Associated terms: outer membrane [GO:0019867]; Domain features: DOMAIN 315-378; note="POTRA_2"; evidence="ECO:0000259 Pfam:PF08479"; DOMAIN 405-466; note="POTRA"; evidence="ECO:0000259 Pfam:PF07244"; DOMAIN 493-833; note="Bac_surface_Ag"; evidence="ECO:0000259 Pfam:PF01103" Keywords: 3D-structure; Signal                                                                                           |
| alr3345 | Q8YRU8 | 340 | Alr3345 protein; Cellular component: outer membrane-bounded periplasmic space [GO:0030288]; Associated terms: outer membrane-bounded periplasmic space                                                                                                                                                                                                                                                                                                                        |

|                                 |              |        |     |                                                                                                                                                                                                                                                                                                                                                                                                                                                                                                                                                                                                                                                                                                                                                                                                                  |
|---------------------------------|--------------|--------|-----|------------------------------------------------------------------------------------------------------------------------------------------------------------------------------------------------------------------------------------------------------------------------------------------------------------------------------------------------------------------------------------------------------------------------------------------------------------------------------------------------------------------------------------------------------------------------------------------------------------------------------------------------------------------------------------------------------------------------------------------------------------------------------------------------------------------|
|                                 |              |        |     | [GO:0030288]                                                                                                                                                                                                                                                                                                                                                                                                                                                                                                                                                                                                                                                                                                                                                                                                     |
|                                 | alr4028<br>* | Q8YQ12 | 287 | Alr4028 protein; Domain features: DOMAIN 93-201; note="Plug"; evidence="ECO:0000259 Pfam:PF07715" Keywords:                                                                                                                                                                                                                                                                                                                                                                                                                                                                                                                                                                                                                                                                                                      |
|                                 | alr4029<br>* | Q8YQ11 | 258 | Alr4029 protein; Domain features: DOMAIN 2-255; note="TonB_dep_Rec"; evidence="ECO:0000259 Pfam:PF00593" Keywords: Receptor                                                                                                                                                                                                                                                                                                                                                                                                                                                                                                                                                                                                                                                                                      |
|                                 | alr4280<br>* | Q8YPB8 | 436 | Alr4280 protein; Transmembrane; Domain features: DOMAIN 74-127; note="Biotin_lipoyl_2"; evidence="ECO:0000259 Pfam:PF13533" Keywords: Coiled coil                                                                                                                                                                                                                                                                                                                                                                                                                                                                                                                                                                                                                                                                |
|                                 | alr4821<br>* | Q8YMV5 | 352 | Alr4821 protein; Cellular component: integral component of membrane [GO:0016021]; Associated terms: integral component of membrane [GO:0016021]; Keywords: Coiled coil; Membrane; Transmembrane; Transmembrane helix                                                                                                                                                                                                                                                                                                                                                                                                                                                                                                                                                                                             |
|                                 | alr7346      | Q8YKF2 | 262 | Alr7346 protein; Subcellular location: Periplasm. Note=Periplasmic or loosely attached to the cytoplasmic or the outer membrane; Domain features: DOMAIN 6-258; note="DUF3598"; evidence="ECO:0000259 Pfam:PF12204" Keywords: Plasmid                                                                                                                                                                                                                                                                                                                                                                                                                                                                                                                                                                            |
|                                 | nucA         | P38446 | 274 | Nuclease (EC 3.1.30.-) (Endonuclease); Pathway: Carbohydrate metabolism; tricarboxylic acid cycle; isocitrate from oxaloacetate: step 2/2. {ECO:0000256 PIRNR:PIRNR036687}; Function: Catalyzes the degradation of both RNA and DNA; has the potential to act as an endonuclease; Cellular component: periplasmic space [GO:0042597]; Associated terms: periplasmic space [GO:0042597]; endonuclease activity [GO:0004519]; metal ion binding [GO:0046872]; nucleic acid binding [GO:0003676]; Molecular function: endonuclease activity [GO:0004519]; metal ion binding [GO:0046872]; nucleic acid binding [GO:0003676]; Keywords: 3D-structure; Endonuclease; Hydrolase; Magnesium; Manganese; Metal-binding; Nuclease; Periplasm; Plasmid; Signal; Protein families: DNA/RNA non-specific endonuclease family |
| Carbon<br>metaboli<br>sm<br>and | all1267      | Q8YXE6 | 876 | Aconitate hydratase B (EC 4.2.1.3) (EC 4.2.1.99) (2-methylisocitrate dehydratase) ; Biological process: tricarboxylic acid cycle [GO:0006099]; Cellular component: cytosol [GO:0005829]; Associated terms: cytosol [GO:0005829]; 2-methylisocitrate dehydratase activity [GO:0047456]; 4 iron, 4 sulfur cluster binding [GO:0051539]; aconitate hydratase activity [GO:0003994];                                                                                                                                                                                                                                                                                                                                                                                                                                 |

|          |        |     |                                                                                                                                                                                                                                                                                                                                                                                                                                                                                                                                                                                                                                                                                                                                                   |
|----------|--------|-----|---------------------------------------------------------------------------------------------------------------------------------------------------------------------------------------------------------------------------------------------------------------------------------------------------------------------------------------------------------------------------------------------------------------------------------------------------------------------------------------------------------------------------------------------------------------------------------------------------------------------------------------------------------------------------------------------------------------------------------------------------|
|          |        |     | citrate dehydratase activity [GO:0047780]; metal ion binding [GO:0046872]; tricarboxylic acid cycle [GO:0006099]; Molecular function: 2-methylisocitrate dehydratase activity [GO:0047456]; 4 iron, 4 sulfur cluster binding [GO:0051539]; aconitate hydratase activity [GO:0003994]; citrate dehydratase activity [GO:0047780]; metal ion binding [GO:0046872]; Domain features: DOMAIN 4-175; note="Aconitase_B_N"; evidence="ECO:0000259 Pfam:PF11791"; DOMAIN 187-390; note="Aconitase_2_N"; evidence="ECO:0000259 Pfam:PF06434"; DOMAIN 479-825; note="Aconitase"; evidence="ECO:0000259 Pfam:PF00330" Keywords: 4Fe-4S; Iron; Iron-sulfur; Lyase; Metal-binding; Tricarboxylic acid cycle; Protein families: Aconitase/IPM isomerase family |
| all2127* | Q8YV54 | 452 | All2127 protein; Associated terms: 4 iron, 4 sulfur cluster binding [GO:0051539]; catalytic activity [GO:0003824]; metal ion binding [GO:0046872]; Molecular function: 4 iron, 4 sulfur cluster binding [GO:0051539]; catalytic activity [GO:0003824]; metal ion binding [GO:0046872]; Domain features: DOMAIN 96-239; note="Radical_SAM"; evidence="ECO:0000259 Pfam:PF04055" Keywords: 4Fe-4S; Iron; Iron-sulfur; Metal-binding; S-adenosyl-L-methionine                                                                                                                                                                                                                                                                                        |
| all2396  | Q8YUF4 | 454 | All2396 protein; Keywords:                                                                                                                                                                                                                                                                                                                                                                                                                                                                                                                                                                                                                                                                                                                        |
| all4388  | Q8YP14 | 493 | All4388 protein; Cellular component: membrane [GO:0016020]; Associated terms: membrane [GO:0016020]; polysaccharide transmembrane transporter activity [GO:0015159]; Molecular function: polysaccharide transmembrane transporter activity [GO:0015159]; Domain features: DOMAIN 380-433; note="SLBB"; evidence="ECO:0000259 Pfam:PF10531" Keywords: Signal                                                                                                                                                                                                                                                                                                                                                                                       |
| all5089  | Q8YM51 | 478 | Phosphoglucomutase/phosphomannomutase ; Biological process: carbohydrate metabolic process [GO:0005975]; Associated terms: intramolecular transferase activity, phosphotransferases [GO:0016868]; magnesium ion binding [GO:0000287]; carbohydrate metabolic process [GO:0005975]; Molecular function: intramolecular transferase activity, phosphotransferases [GO:0016868]; magnesium ion binding [GO:0000287]; Domain features: DOMAIN 8-141; note="PGM_PMM_I"; evidence="ECO:0000259 Pfam:PF02878"; DOMAIN 162-268; note="PGM_PMM_II";                                                                                                                                                                                                        |

|          |        |     |                                                                                                                                                                                                                                                                                                                                                                                                                                                                                                                                                                                                         |
|----------|--------|-----|---------------------------------------------------------------------------------------------------------------------------------------------------------------------------------------------------------------------------------------------------------------------------------------------------------------------------------------------------------------------------------------------------------------------------------------------------------------------------------------------------------------------------------------------------------------------------------------------------------|
|          |        |     | evidence="ECO:0000259 Pfam:PF02879"; DOMAIN 277-382; note="PGM_PMM_III"; evidence="ECO:0000259 Pfam:PF02880"; DOMAIN 418-468; note="PGM_PMM_IV"; evidence="ECO:0000259 Pfam:PF00408" Keywords: Isomerase; Magnesium; Metal-binding; Protein families: Phosphohexose mutase family                                                                                                                                                                                                                                                                                                                       |
| all5295* | Q8YLK3 | 334 | All5295 protein; Associated terms: catalytic activity [GO:0003824]; coenzyme binding [GO:0050662]; Molecular function: catalytic activity [GO:0003824]; coenzyme binding [GO:0050662]; Domain features: DOMAIN 7-234; note="Epimerase"; evidence="ECO:0000259 Pfam:PF01370"                                                                                                                                                                                                                                                                                                                             |
| all7222  | Q8YKR9 | 348 | All7222 protein; Domain features: DOMAIN 94-198; note="CbiA"; evidence="ECO:0000259 Pfam:PF01656" Keywords: Plasmid                                                                                                                                                                                                                                                                                                                                                                                                                                                                                     |
| alr0658  | Q8YZ29 | 461 | UDP-glucose 6-dehydrogenase (EC 1.1.1.22) ; Biological process: polysaccharide biosynthetic process [GO:0000271]; D binding [GO:0051287]; UDP-glucose 6-dehydrogenase activity [GO:0003979]; polysaccharide biosynthetic process [GO:0000271]; Molecular function: NAD binding [GO:0051287]; UDP-glucose 6-dehydrogenase activity [GO:0003979]; Domain features: DOMAIN 344-446; note="UDPG_MGDP_dh_C"; evidence="ECO:0000259 SMART:SM00984" Keywords: NAD; Oxidoreductase; Protein families: UDP-glucose/GDP-mannose dehydrogenase family                                                              |
| alr0663* | Q8YZ24 | 632 | Alr0663 protein ; Biological process: carbohydrate metabolic process [GO:0005975]; Associated terms: catalytic activity [GO:0003824]; carbohydrate metabolic process [GO:0005975]; Molecular function: catalytic activity [GO:0003824]; Domain features: DOMAIN 55-504; note="Amy"; evidence="ECO:0000259 SMART:SM00642"                                                                                                                                                                                                                                                                                |
| alr0782  | Q8YYR4 | 235 | Ribulose-phosphate 3-epimerase (EC 5.1.3.1) ; Biological process: carbohydrate metabolic process [GO:0005975]; pentose-phosphate shunt [GO:0006098]; Associated terms: metal ion binding [GO:0046872]; ribulose-phosphate 3-epimerase activity [GO:0004750]; carbohydrate metabolic process [GO:0005975]; pentose-phosphate shunt [GO:0006098]; Molecular function: metal ion binding [GO:0046872]; ribulose-phosphate 3-epimerase activity [GO:0004750]; Keywords: Carbohydrate metabolism; Cobalt; Isomerase; Manganese; Metal-binding; Zinc; Protein families: Ribulose-phosphate 3-epimerase family |
| alr2090  | Q8YV91 | 602 | Alr2090 protein; Domain features: DOMAIN 406-469;                                                                                                                                                                                                                                                                                                                                                                                                                                                                                                                                                       |

|              |        |     |                                                                                                                                                                                                                                                                                                                                                                                                                                                                                                                          |
|--------------|--------|-----|--------------------------------------------------------------------------------------------------------------------------------------------------------------------------------------------------------------------------------------------------------------------------------------------------------------------------------------------------------------------------------------------------------------------------------------------------------------------------------------------------------------------------|
|              |        |     | note="SLH";<br>evidence="ECO:0000259 PROSITE:PS51272"; DOMAIN<br>470-529;<br>note="SLH";<br>evidence="ECO:0000259 PROSITE:PS51272"; DOMAIN<br>531-595;<br>note="SLH";<br>evidence="ECO:0000259 PROSITE:PS51272"                                                                                                                                                                                                                                                                                                          |
| alr3338      | Q8YRV4 | 449 | Phosphoglycerate mutase; Associated terms: catalytic activity [GO:0003824]; Molecular function: catalytic activity [GO:0003824]; Keywords: Protein families: Phosphoglycerate mutase family                                                                                                                                                                                                                                                                                                                              |
| alr3729      | Q8YQT8 | 138 | Alr3729 protein; Biological process: polyketide metabolic process [GO:0030638]; Associated terms: polyketide metabolic process [GO:0030638]                                                                                                                                                                                                                                                                                                                                                                              |
| alr4380<br>* | Q8YP22 | 326 | Delta-aminolevulinic acid dehydratase (EC 4.2.1.24) ; Biological process: porphyrin-containing compound biosynthetic process [GO:0006779]; Associated terms: metal ion binding [GO:0046872]; porphobilinogen synthase activity [GO:0004655]; porphyrin-containing compound biosynthetic process [GO:0006779]; Molecular function: metal ion binding [GO:0046872]; porphobilinogen synthase activity [GO:0004655]; Keywords: Lyase; Magnesium; Metal-binding; Porphyrin biosynthesis; Zinc; Protein families: ALAD family |
| alr4566<br>* | Q8YNJ9 | 384 | NADH-dependent butanol dehydrogenase; Associated terms: metal ion binding [GO:0046872]; oxidoreductase activity [GO:0016491]; Molecular function: metal ion binding [GO:0046872]; oxidoreductase activity [GO:0016491]; Domain features: DOMAIN 9-362; note="Fe-ADH";<br>evidence="ECO:0000259 Pfam:PF00465"                                                                                                                                                                                                             |
| alr7200<br>* | Q8YKU1 | 539 | Alr7200 protein; Associated terms: ATP binding [GO:0005524]; Molecular function: ATP binding [GO:0005524]; Domain features: DOMAIN 279-408; note="AAA";<br>evidence="ECO:0000259 SMART:SM00382" Keywords: Plasmid                                                                                                                                                                                                                                                                                                        |
| ccmK*        | Q8YYI1 | 114 | Carbon dioxide concentrating mechanism protein; Subcellular location: Cell inner membrane {ECO:0000255 HAMAP-Rule:MF_01701}; Peripheral membrane protein {ECO:0000255 HAMAP-Rule:MF_01701}; Domain features: DOMAIN 3-81; note="BMC";<br>evidence="ECO:0000259 SMART:SM00877"                                                                                                                                                                                                                                            |
| cysA*        | Q8ZOH0 | 338 | Sulfate/thiosulfate import ATP-binding protein CysA (EC 7.3.2.3) (Sulfate-transporting ATPase); Function: Part of the ABC transporter complex CysAWTP involved in                                                                                                                                                                                                                                                                                                                                                        |



|                            |          |        |     |                                                                                                                                                                                                                                                                                                                                                                                                                                                                                                                                                                                                                                                                                                                                                                                                                                                                                                                                                                                                                                                                         |
|----------------------------|----------|--------|-----|-------------------------------------------------------------------------------------------------------------------------------------------------------------------------------------------------------------------------------------------------------------------------------------------------------------------------------------------------------------------------------------------------------------------------------------------------------------------------------------------------------------------------------------------------------------------------------------------------------------------------------------------------------------------------------------------------------------------------------------------------------------------------------------------------------------------------------------------------------------------------------------------------------------------------------------------------------------------------------------------------------------------------------------------------------------------------|
|                            |          |        |     | sulfate/thiosulfate import. Responsible for energy coupling to the transport system. {ECO:0000255 HAMAP-Rule:MF_01701}; Cellular component: ATP-binding cassette (ABC) transporter complex [GO:0043190]; Associated terms: ATP-binding cassette (ABC) transporter complex [GO:0043190]; ATP binding [GO:0005524]; ATPase activity [GO:0016887]; ATPase-coupled sulfate transmembrane transporter activity [GO:0015419]; ATPase-coupled thiosulfate transmembrane transporter activity [GO:0102025]; Molecular function: ATPase activity [GO:0016887]; ATPase-coupled sulfate transmembrane transporter activity [GO:0015419]; ATPase-coupled thiosulfate transmembrane transporter activity [GO:0102025]; ATP binding [GO:0005524]; Domain features: DOMAIN 3-233; note="ABC transporter"; evidence="ECO:0000255 HAMAP-Rule:MF_01701" Keywords: ATP-binding; Cell inner membrane; Cell membrane; Membrane; Nucleotide-binding; Sulfate transport; Translocase; Transport; Protein families: ABC transporter superfamily, Sulfate/tungstate importer (TC 3.A.1.6) family |
| Organo-nitrogen metabolism | all0666* | Q8YZ21 | 348 | All0666 protein; Cross-reference (InterPro): DUF1822 (This entry includes a group of bacterial proteins, including EipB from Brucella. EipB is a periplasmic protein that functions as part of a system required for cell envelope homeostasis)                                                                                                                                                                                                                                                                                                                                                                                                                                                                                                                                                                                                                                                                                                                                                                                                                         |
|                            | all0667* | Q8YZ20 | 481 | All0667 protein; Protein-protein interaction databases (String): Three gene neighborhood (all0666, tplA, alr0841 )                                                                                                                                                                                                                                                                                                                                                                                                                                                                                                                                                                                                                                                                                                                                                                                                                                                                                                                                                      |
|                            | all2425  | Q8YUC7 | 255 | All2425 protein; Domain features: DOMAIN 128-243; note="Peptidase_M15_3"; evidence="ECO:0000259 Pfam:PF08291"                                                                                                                                                                                                                                                                                                                                                                                                                                                                                                                                                                                                                                                                                                                                                                                                                                                                                                                                                           |
|                            | all2500  | Q8YU55 | 428 | Carboxyl-terminal protease; Associated terms: serine-type peptidase activity [GO:0008236]; Molecular function: serine-type peptidase activity [GO:0008236]; Domain features: DOMAIN 106-190; note="PDZ"; evidence="ECO:0000259 PROSITE:PS50106" Keywords: Coiled coil; Hydrolase; Protease; Serine protease; Protein families: Peptidase S41A family                                                                                                                                                                                                                                                                                                                                                                                                                                                                                                                                                                                                                                                                                                                    |
|                            | all4737* | Q8YN33 | 223 | All4737 protein; Associated terms: cofactor binding [GO:0048037]; Molecular function: cofactor binding [GO:0048037]; Family and domain databases (InterPro): FMN-binding split barrel, Pyridoxamine 5'-phosphate oxidase-related.                                                                                                                                                                                                                                                                                                                                                                                                                                                                                                                                                                                                                                                                                                                                                                                                                                       |
|                            | all4999  | Q8YMD5 | 597 | N-acetylmuramoyl-L-alanine amidase ; Biological process: peptidoglycan catabolic process [GO:0009253]; Associated                                                                                                                                                                                                                                                                                                                                                                                                                                                                                                                                                                                                                                                                                                                                                                                                                                                                                                                                                       |

|              |        |     |                                                                                                                                                                                                                                                                                                                                                                                                                                                                                                         |
|--------------|--------|-----|---------------------------------------------------------------------------------------------------------------------------------------------------------------------------------------------------------------------------------------------------------------------------------------------------------------------------------------------------------------------------------------------------------------------------------------------------------------------------------------------------------|
|              |        |     | terms: N-acetylmuramoyl-L-alanine amidase activity [GO:0008745]; peptidoglycan catabolic process [GO:0009253]; Molecular function: N-acetylmuramoyl-L-alanine amidase activity [GO:0008745]; Domain features: DOMAIN 237-295; note="SH3b"; evidence="ECO:0000259 SMART:SM00287"; DOMAIN 478-590; note="MurNAc-LAA"; evidence="ECO:0000259 SMART:SM00646"                                                                                                                                                |
| all7011      | Q8YLC4 | 323 | All7011 protein; Associated terms: ATP binding [GO:0005524]; metal ion binding [GO:0046872]; Molecular function: ATP binding [GO:0005524]; metal ion binding [GO:0046872]; Domain features: DOMAIN 129-320; note="ATP-grasp"; evidence="ECO:0000259 PROSITE:PS50975" Keywords: ATP-binding; Nucleotide-binding; Plasmid                                                                                                                                                                                 |
| alr0668<br>* | Q8YZ19 | 198 | Alr0668 protein; Isolated within the heterocyst fraction. <sup>9</sup>                                                                                                                                                                                                                                                                                                                                                                                                                                  |
| alr0669<br>* | Q8YZ18 | 295 | Alr0669 protein; Domain features: DOMAIN 26-76; note="PG_binding_1"; evidence="ECO:0000259 Pfam:PF01471"; Family and domain databases (InterPro): PGBD superfamily (This superfamily represents peptidoglycan binding domain (PGBD). PGBD may have a general peptidoglycan binding function. It has a core structure consisting of a closed, three-helical bundle with a left-handed twist. It is found at the N or C terminus of a variety of enzymes involved in bacterial cell wall degradation)     |
| alr2927<br>* | Q8YT00 | 132 | Alr2927 protein; Domain features: DOMAIN 48-112; note="PPC"; evidence="ECO:0000259 Pfam:PF04151"                                                                                                                                                                                                                                                                                                                                                                                                        |
| alr3301<br>* | Q8YRZ1 | 277 | Alr3301 protein; Keywords: Coiled coil; Associated to heterocyst differentiation, <sup>10</sup> and to nitrogen deprivation. <sup>11</sup>                                                                                                                                                                                                                                                                                                                                                              |
| alr3804<br>* | Q8YQL7 | 383 | Deoxyhypusine synthase-like protein (EC 2.5.-.-) ; Biological process: peptidyl-lysine modification to peptidyl-hypusine [GO:0008612]; Associated terms: transferase activity, transferring alkyl or aryl (other than methyl) groups [GO:0016765]; peptidyl-lysine modification to peptidyl-hypusine [GO:0008612]; Molecular function: transferase activity, transferring alkyl or aryl (other than methyl) groups [GO:0016765]; Keywords: Transferase; Protein families: Deoxyhypusine synthase family |
| asl0662<br>* | Q8YZ25 | 59  | Asl0662 protein; Related to heterocyst and nitrogen starvation. <sup>11</sup>                                                                                                                                                                                                                                                                                                                                                                                                                           |
| cynS         | P58703 | 146 | Cyanate hydratase (Cyanase) (EC 4.2.1.104) (Cyanate hydrolase) (Cyanate lyase); Function: Catalyzes the reaction of cyanate with bicarbonate to produce ammonia                                                                                                                                                                                                                                                                                                                                         |

|       |        |     |  |                                                                                                                                                                                                                                                                                                                                                                                                                                                                                                                                                                                                                                                                                                                                                                                                                                                                                                                                                                                                                                                                                                                                                                                                                                    |
|-------|--------|-----|--|------------------------------------------------------------------------------------------------------------------------------------------------------------------------------------------------------------------------------------------------------------------------------------------------------------------------------------------------------------------------------------------------------------------------------------------------------------------------------------------------------------------------------------------------------------------------------------------------------------------------------------------------------------------------------------------------------------------------------------------------------------------------------------------------------------------------------------------------------------------------------------------------------------------------------------------------------------------------------------------------------------------------------------------------------------------------------------------------------------------------------------------------------------------------------------------------------------------------------------|
|       |        |     |  | and carbon dioxide. {ECO:0000255 HAMAP-Rule:MF_00535}; Subcellular location: Cytoplasm {ECO:0000255 HAMAP-Rule:MF_00102}; Biological process: cyanate metabolic process [GO:0009439]; Associated terms: cyanate hydratase activity [GO:0008824]; DNA binding [GO:0003677]; cyanate metabolic process [GO:0009439]; Molecular function: cyanate hydratase activity [GO:0008824]; DNA binding [GO:0003677]; Keywords: Lyase; Protein families: Cyanase family                                                                                                                                                                                                                                                                                                                                                                                                                                                                                                                                                                                                                                                                                                                                                                        |
| dapB  | Q8YU19 | 278 |  | 4-hydroxy-tetrahydrodipicolinate reductase (HTPA reductase) (EC 1.17.1.8); Function: Catalyzes the conversion of 4-hydroxy-tetrahydrodipicolinate (HTPA) to tetrahydrodipicolinate. {ECO:0000255 HAMAP-Rule:MF_00102}; Subcellular location: Cytoplasm {ECO:0000250 UniProtKB:P9WN39}; Biological process: diaminopimelate biosynthetic process [GO:0019877]; lysine biosynthetic process via diaminopimelate [GO:0009089]; Cellular component: cytoplasm [GO:0005737]; Associated terms: cytoplasm [GO:0005737]; 4-hydroxy-tetrahydrodipicolinate reductase [GO:0008839]; NAD binding [GO:0051287]; NADP binding [GO:0050661]; oxidoreductase activity, acting on CH or CH2 groups, NAD or NADP as acceptor [GO:0016726]; diaminopimelate biosynthetic process [GO:0019877]; lysine biosynthetic process via diaminopimelate [GO:0009089]; Molecular function: 4-hydroxy-tetrahydrodipicolinate reductase [GO:0008839]; NAD binding [GO:0051287]; NADP binding [GO:0050661]; oxidoreductase activity, acting on CH or CH2 groups, NAD or NADP as acceptor [GO:0016726]; Keywords: Amino-acid biosynthesis; Cytoplasm; Diaminopimelate biosynthesis; Lysine biosynthesis; NAD; NADP; Oxidoreductase; Protein families: DapB family |
| glnA* | P00964 | 474 |  | Glutamine synthetase (GS) (EC 6.3.1.2) (Glutamate--ammonia ligase) (Glutamine synthetase I beta) (GSI beta); Function: Involved in nitrogen metabolism via ammonium assimilation. Catalyzes the ATP-dependent biosynthesis of glutamine from glutamate and ammonia. {ECO:0000250 UniProtKB:P77961}; Biological process: glutamine biosynthetic process [GO:0006542]; heterocyst differentiation [GO:0043158]; nitrogen fixation [GO:0009399]; Cellular component: cytoplasm [GO:0005737]; Associated terms: cytoplasm [GO:0005737]; ATP binding [GO:0005524]; glutamate-ammonia ligase activity [GO:0004356]; metal ion binding                                                                                                                                                                                                                                                                                                                                                                                                                                                                                                                                                                                                    |

|      |        |     |  |                                                                                                                                                                                                                                                                                                                                                                                                                                                                                                                                                                                                                                                                                                                                                                                                                                                                                                                                                                                                             |
|------|--------|-----|--|-------------------------------------------------------------------------------------------------------------------------------------------------------------------------------------------------------------------------------------------------------------------------------------------------------------------------------------------------------------------------------------------------------------------------------------------------------------------------------------------------------------------------------------------------------------------------------------------------------------------------------------------------------------------------------------------------------------------------------------------------------------------------------------------------------------------------------------------------------------------------------------------------------------------------------------------------------------------------------------------------------------|
|      |        |     |  | [GO:0046872]; glutamine biosynthetic process [GO:0006542]; heterocyst differentiation [GO:0043158]; nitrogen fixation [GO:0009399]; Molecular function: ATP binding [GO:0005524]; glutamate-ammonia ligase activity [GO:0004356]; metal ion binding [GO:0046872]; Keywords: ATP-binding; Cytoplasm; Direct protein sequencing; Heterocyst; Ligase; Magnesium; Metal-binding; Nitrogen fixation; Nucleotide-binding; Phosphoprotein; Protein families: Glutamine synthetase family                                                                                                                                                                                                                                                                                                                                                                                                                                                                                                                           |
| leuC | Q8YX02 | 467 |  | 3-isopropylmalate dehydratase large subunit (EC 4.2.1.33) (Alpha-IPM isomerase) (IPMI) (Isopropylmalate isomerase); Function: Catalyzes the isomerization between 2-isopropylmalate and 3-isopropylmalate, via the formation of 2-isopropylmaleate. {ECO:0000255 HAMAP-Rule:MF_01026}; Subcellular location: Cytoplasm {ECO:0000255 HAMAP-Rule:MF_00451}; Biological process: leucine biosynthetic process [GO:0009098]; Associated terms: 3-isopropylmalate dehydratase activity [GO:0003861]; 4 iron, 4 sulfur cluster binding [GO:0051539]; metal ion binding [GO:0046872]; leucine biosynthetic process [GO:0009098]; Molecular function: 3-isopropylmalate dehydratase activity [GO:0003861]; 4 iron, 4 sulfur cluster binding [GO:0051539]; metal ion binding [GO:0046872]; Keywords: 4Fe-4S; Amino-acid biosynthesis; Branched-chain amino acid biosynthesis; Iron; Iron-sulfur; Leucine biosynthesis; Lyase; Metal-binding; Protein families: Aconitase/IPM isomerase family, LeuC type 1 subfamily |
| ndk  | Q8YRP2 | 149 |  | Nucleoside diphosphate kinase (NDK) (NDP kinase) (EC 2.7.4.6) (Nucleoside-2-P kinase); Function: Major role in the synthesis of nucleoside triphosphates other than ATP. The ATP gamma phosphate is transferred to the NDP beta phosphate via a ping-pong mechanism, using a phosphorylated active-site intermediate. {ECO:0000255 HAMAP-Rule:MF_00451}; Subcellular location: Cytoplasm {ECO:0000255 HAMAP-Rule:MF_00181}; Biological process: CTP biosynthetic process [GO:0006241]; GTP biosynthetic process [GO:0006183]; UTP biosynthetic process [GO:0006228]; Cellular component: cytoplasm [GO:0005737]; Associated terms: cytoplasm [GO:0005737]; ATP binding [GO:0005524]; metal ion binding [GO:0046872]; nucleoside diphosphate kinase activity [GO:0004550]; CTP biosynthetic process [GO:0006241]; GTP biosynthetic process [GO:0006183]; UTP biosynthetic process                                                                                                                            |

|                         |              |        |     |                                                                                                                                                                                                                                                                                                                                                                                                                                                                                                                                                                                                                                                                                                                                                                                                                             |
|-------------------------|--------------|--------|-----|-----------------------------------------------------------------------------------------------------------------------------------------------------------------------------------------------------------------------------------------------------------------------------------------------------------------------------------------------------------------------------------------------------------------------------------------------------------------------------------------------------------------------------------------------------------------------------------------------------------------------------------------------------------------------------------------------------------------------------------------------------------------------------------------------------------------------------|
|                         |              |        |     | [GO:0006228]; Molecular function: ATP binding [GO:0005524]; metal ion binding [GO:0046872]; nucleoside diphosphate kinase activity [GO:0004550]; Keywords: ATP-binding; Cytoplasm; Kinase; Magnesium; Metal-binding; Nucleotide metabolism; Nucleotide-binding; Phosphoprotein; Transferase; Protein families: NDK family                                                                                                                                                                                                                                                                                                                                                                                                                                                                                                   |
|                         | pepA         | Q8Z064 | 491 | Probable cytosol aminopeptidase (EC 3.4.11.1) (Leucine aminopeptidase) (LAP) (EC 3.4.11.10) (Leucyl aminopeptidase); Function: Presumably involved in the processing and regular turnover of intracellular proteins. Catalyzes the removal of unsubstituted N-terminal amino acids from various peptides. {ECO:0000255 HAMAP-Rule:MF_00181}; Cellular component: cytoplasm [GO:0005737]; Associated terms: cytoplasm [GO:0005737]; aminopeptidase activity [GO:0004177]; manganese ion binding [GO:0030145]; metalloexopeptidase activity [GO:0008235]; Molecular function: aminopeptidase activity [GO:0004177]; manganese ion binding [GO:0030145]; metalloexopeptidase activity [GO:0008235]; Keywords: Aminopeptidase; Cytoplasm; Hydrolase; Manganese; Metal-binding; Protease; Protein families: Peptidase M17 family |
| Nucleic acid metabolism | alr4692<br>* | Q8YN78 | 155 | Transcriptional regulator; Associated terms: DNA binding [GO:0003677]; DNA-binding transcription factor activity [GO:0003700]; Molecular function: DNA binding [GO:0003677]; DNA-binding transcription factor activity [GO:0003700]; Domain features: DOMAIN 20-152; note="HTH marR-type"; evidence="ECO:0000259 PROSITE:PS50995" Keywords: DNA-binding; Transcription; Transcription regulation                                                                                                                                                                                                                                                                                                                                                                                                                            |
|                         | alr7083<br>* | Q8YL52 | 372 | Chromosome partitioning protein, ParB family; Associated terms: DNA binding [GO:0003677]; Molecular function: DNA binding [GO:0003677]; Domain features: DOMAIN 61-147; note="ParB"; evidence="ECO:0000259 SMART:SM00470" Keywords: Coiled coil; Plasmid; Protein families: ParB family                                                                                                                                                                                                                                                                                                                                                                                                                                                                                                                                     |
|                         | alr7311<br>* | Q8YKI6 | 404 | Alr7311 protein; Subcellular location: Cytoplasm {ECO:0000255 HAMAP-Rule:MF_00054}; Biological process: DNA-templated transcription, initiation [GO:0006352]; Associated terms: DNA-binding transcription factor activity [GO:0003700]; DNA-templated transcription, initiation [GO:0006352]; Molecular function: DNA-binding transcription factor activity [GO:0003700]; Domain features: DOMAIN 308-                                                                                                                                                                                                                                                                                                                                                                                                                      |

|      |        |     |                                                                                                                                                                                                                                                                                                                                                                                                                                                                                                                                                                                                                                                                                                                                                                                                                                                                                                                                                                                                                                                                                                                                                                                                                           |
|------|--------|-----|---------------------------------------------------------------------------------------------------------------------------------------------------------------------------------------------------------------------------------------------------------------------------------------------------------------------------------------------------------------------------------------------------------------------------------------------------------------------------------------------------------------------------------------------------------------------------------------------------------------------------------------------------------------------------------------------------------------------------------------------------------------------------------------------------------------------------------------------------------------------------------------------------------------------------------------------------------------------------------------------------------------------------------------------------------------------------------------------------------------------------------------------------------------------------------------------------------------------------|
|      |        |     | 351; note="Sigma70_r4";<br>evidence="ECO:0000259 Pfam:PF04545" Keywords:<br>Plasmid                                                                                                                                                                                                                                                                                                                                                                                                                                                                                                                                                                                                                                                                                                                                                                                                                                                                                                                                                                                                                                                                                                                                       |
| fusA | Q8YP62 | 692 | Elongation factor G (EF-G); Function: Catalyzes the GTP-dependent ribosomal translocation step during translation elongation. During this step, the ribosome changes from the pre-translocational (PRE) to the post-translocational (POST) state as the newly formed A-site-bound peptidyl-tRNA and P-site-bound deacylated tRNA move to the P and E sites, respectively. Catalyzes the coordinated movement of the two tRNA molecules, the mRNA and conformational changes in the ribosome. {ECO:0000255 HAMAP-Rule:MF_00054}; Subcellular location: Cytoplasm {ECO:0000256 HAMAP-Rule:MF_00839}; Cellular component: cytoplasm [GO:0005737]; Associated terms: cytoplasm [GO:0005737]; GTP binding [GO:0005525]; GTPase activity [GO:0003924]; translation elongation factor activity [GO:0003746]; Molecular function: GTPase activity [GO:0003924]; GTP binding [GO:0005525]; translation elongation factor activity [GO:0003746]; Domain features: DOMAIN 8-282; note="tr-type G" Keywords: Cytoplasm; Elongation factor; GTP-binding; Nucleotide-binding; Protein biosynthesis; Protein families: TRAFAC class translation factor GTPase superfamily, Classic translation factor GTPase family, EF-G/EF-2 subfamily |
| hpf  | Q8YSA5 | 213 | Ribosome hibernation promoting factor (HPF); Function: Required for dimerization of active 70S ribosomes into 100S ribosomes in stationary phase; 100S ribosomes are translationally inactive and sometimes present during exponential growth. {ECO:0000256 HAMAP-Rule:MF_00839}; Protein L1 is also a translational repressor protein, it controls the translation of the L11 operon by binding to its mRNA. {ECO:0000255 HAMAP-Rule:MF_01318}; ; Biological process: primary metabolic process [GO:0044238]; regulation of translation [GO:0006417]; Cellular component: cytoplasm [GO:0005737]; Associated terms: cytoplasm [GO:0005737]; primary metabolic process [GO:0044238]; regulation of translation [GO:0006417]; Domain features: DOMAIN 130-184; note="Ribosom_S30AE_C"; evidence="ECO:0000259 Pfam:PF16321" Keywords: Coiled coil; Cytoplasm; Translation regulation; Protein families: HPF/YfiA ribosome-associated protein family, Long HPF subfamily                                                                                                                                                                                                                                                     |
| rpl1 | Q8YLJ7 | 238 | 50S ribosomal protein L1; Function: Binds directly to 23S                                                                                                                                                                                                                                                                                                                                                                                                                                                                                                                                                                                                                                                                                                                                                                                                                                                                                                                                                                                                                                                                                                                                                                 |

|      |        |      |                                                                                                                                                                                                                                                                                                                                                                                                                                                                                                                                                                                                                                                                                                                                                                                                                                                                      |                                                                                                                                                                                                                                                                                                                                                                                                                                                                                                                                                                                                                                                                                                                                                                                                                                        |
|------|--------|------|----------------------------------------------------------------------------------------------------------------------------------------------------------------------------------------------------------------------------------------------------------------------------------------------------------------------------------------------------------------------------------------------------------------------------------------------------------------------------------------------------------------------------------------------------------------------------------------------------------------------------------------------------------------------------------------------------------------------------------------------------------------------------------------------------------------------------------------------------------------------|----------------------------------------------------------------------------------------------------------------------------------------------------------------------------------------------------------------------------------------------------------------------------------------------------------------------------------------------------------------------------------------------------------------------------------------------------------------------------------------------------------------------------------------------------------------------------------------------------------------------------------------------------------------------------------------------------------------------------------------------------------------------------------------------------------------------------------------|
|      |        |      |                                                                                                                                                                                                                                                                                                                                                                                                                                                                                                                                                                                                                                                                                                                                                                                                                                                                      | <p>rRNA. The L1 stalk is quite mobile in the ribosome, and is involved in E site tRNA release. {ECO:0000255 HAMAP-Rule:MF_01318}; Biological process: regulation of translation [GO:0006417]; translation [GO:0006412]; Cellular component: large ribosomal subunit [GO:0015934]; Associated terms: large ribosomal subunit [GO:0015934]; rRNA binding [GO:0019843]; structural constituent of ribosome [GO:0003735]; tRNA binding [GO:0000049]; regulation of translation [GO:0006417]; translation [GO:0006412]; Molecular function: rRNA binding [GO:0019843]; structural constituent of ribosome [GO:0003735]; tRNA binding [GO:0000049]; Keywords: RNA-binding; Repressor; Ribonucleoprotein; Ribosomal protein; Translation regulation; rRNA-binding; tRNA-binding; Protein families: Universal ribosomal protein uL1 family</p> |
| rplN | Q8YPI9 | 122  | <p>50S ribosomal protein L14; Function: Binds to 23S rRNA. Forms part of two intersubunit bridges in the 70S ribosome. {ECO:0000255 HAMAP-Rule:MF_01367}; Biological process: translation [GO:0006412]; Cellular component: large ribosomal subunit [GO:0015934]; Associated terms: large ribosomal subunit [GO:0015934]; rRNA binding [GO:0019843]; structural constituent of ribosome [GO:0003735]; translation [GO:0006412]; Molecular function: rRNA binding [GO:0019843]; structural constituent of ribosome [GO:0003735]; Keywords: RNA-binding; Ribonucleoprotein; Ribosomal protein; rRNA-binding; Protein families: Universal ribosomal protein uL14 family</p>                                                                                                                                                                                             |                                                                                                                                                                                                                                                                                                                                                                                                                                                                                                                                                                                                                                                                                                                                                                                                                                        |
| rpoB | P22703 | 1131 | <p>DNA-directed RNA polymerase subunit beta (RNAP subunit beta) (EC 2.7.7.6) (RNA polymerase subunit beta) (Transcriptase subunit beta); Function: DNA-dependent RNA polymerase catalyzes the transcription of DNA into RNA using the four ribonucleoside triphosphates as substrates. {ECO:0000255 HAMAP-Rule:MF_01321}; Biological process: transcription, DNA-templated [GO:0006351]; Associated terms: DNA binding [GO:0003677]; DNA-directed 5'-3' RNA polymerase activity [GO:0003899]; ribonucleoside binding [GO:0032549]; transcription, DNA-templated [GO:0006351]; Molecular function: DNA binding [GO:0003677]; DNA-directed 5'-3' RNA polymerase activity [GO:0003899]; ribonucleoside binding [GO:0032549]; Keywords: DNA-directed RNA polymerase; Nucleotidyltransferase; Transcription; Transferase; Protein families: RNA polymerase beta chain</p> |                                                                                                                                                                                                                                                                                                                                                                                                                                                                                                                                                                                                                                                                                                                                                                                                                                        |

|       |        |      |                                                                                                                                                                                                                                                                                                                                                                                                                                                                                                                                                                                                                                                                                                                                                                                                                                                                                                                                                                                                             |
|-------|--------|------|-------------------------------------------------------------------------------------------------------------------------------------------------------------------------------------------------------------------------------------------------------------------------------------------------------------------------------------------------------------------------------------------------------------------------------------------------------------------------------------------------------------------------------------------------------------------------------------------------------------------------------------------------------------------------------------------------------------------------------------------------------------------------------------------------------------------------------------------------------------------------------------------------------------------------------------------------------------------------------------------------------------|
|       |        |      | family                                                                                                                                                                                                                                                                                                                                                                                                                                                                                                                                                                                                                                                                                                                                                                                                                                                                                                                                                                                                      |
| rpoC2 | P22705 | 1355 | DNA-directed RNA polymerase subunit beta' (RNAP subunit beta') (EC 2.7.7.6) (RNA polymerase subunit beta') (Transcriptase subunit beta'); Function: DNA-dependent RNA polymerase catalyzes the transcription of DNA into RNA using the four ribonucleoside triphosphates as substrates. {ECO:0000255 HAMAP-Rule:MF_01324}; With S5 and S12 plays an important role in translational accuracy. {ECO:0000255 HAMAP-Rule:MF_01306}; ; Biological process: transcription, DNA-templated [GO:0006351]; Associated terms: DNA binding [GO:0003677]; DNA-directed 5'-3' RNA polymerase activity [GO:0003899]; zinc ion binding [GO:0008270]; transcription, DNA-templated [GO:0006351]; Molecular function: DNA binding [GO:0003677]; DNA-directed 5'-3' RNA polymerase activity [GO:0003899]; zinc ion binding [GO:0008270]; Keywords: DNA-directed RNA polymerase; Metal-binding; Nucleotidyltransferase; Transcription; Transferase; Zinc; Protein families: RNA polymerase beta' chain family, RpoC2 subfamily |
| rpsD  | Q8YT10 | 202  | 30S ribosomal protein S4; Function: One of the primary rRNA binding proteins, it binds directly to 16S rRNA where it nucleates assembly of the body of the 30S subunit. {ECO:0000255 HAMAP-Rule:MF_01306}; Located at the back of the 30S subunit body where it stabilizes the conformation of the head with respect to the body. {ECO:0000255 HAMAP-Rule:MF_01307}; ; Biological process: translation [GO:0006412]; Cellular component: small ribosomal subunit [GO:0015935]; Associated terms: small ribosomal subunit [GO:0015935]; rRNA binding [GO:0019843]; structural constituent of ribosome [GO:0003735]; translation [GO:0006412]; Molecular function: rRNA binding [GO:0019843]; structural constituent of ribosome [GO:0003735]; Domain features: DOMAIN 90-152; note="S4 RNA-binding"; evidence="ECO:0000255 HAMAP-Rule:MF_01306" Keywords: RNA-binding; Ribonucleoprotein; Ribosomal protein; rRNA-binding; Protein families: Universal ribosomal protein uS4 family                          |
| rpsE  | Q8YPJ5 | 174  | 30S ribosomal protein S5; Function: With S4 and S12 plays an important role in translational accuracy. {ECO:0000255 HAMAP-Rule:MF_01307}; Biological process: translation [GO:0006412]; Cellular component: small ribosomal subunit [GO:0015935]; Associated terms: small ribosomal subunit [GO:0015935]; rRNA binding [GO:0019843]; structural constituent of ribosome                                                                                                                                                                                                                                                                                                                                                                                                                                                                                                                                                                                                                                     |



|      |        |     |                                                                                                                                                                                                                                                                                                                                                                                                                                                                                                                                                                                                                                                                                                                                                                                                                                                                                                                                                                                                                                                            |
|------|--------|-----|------------------------------------------------------------------------------------------------------------------------------------------------------------------------------------------------------------------------------------------------------------------------------------------------------------------------------------------------------------------------------------------------------------------------------------------------------------------------------------------------------------------------------------------------------------------------------------------------------------------------------------------------------------------------------------------------------------------------------------------------------------------------------------------------------------------------------------------------------------------------------------------------------------------------------------------------------------------------------------------------------------------------------------------------------------|
|      |        |     | <p>[GO:0003735]; translation [GO:0006412]; Molecular function: rRNA binding [GO:0019843]; structural constituent of ribosome [GO:0003735]; Domain features: DOMAIN 18-81; note="S5 DRBM"; evidence="ECO:0000255 HAMAP-Rule:MF_01307"</p> <p>Keywords: RNA-binding; Ribonucleoprotein; Ribosomal protein; rRNA-binding; Protein families: Universal ribosomal protein uS5 family</p>                                                                                                                                                                                                                                                                                                                                                                                                                                                                                                                                                                                                                                                                        |
| rpsG | Q8YP61 | 156 | <p>30S ribosomal protein S7; Function: One of the primary rRNA binding proteins, it binds directly to 16S rRNA where it nucleates assembly of the head domain of the 30S subunit. Is located at the subunit interface close to the decoding center, probably blocks exit of the E-site tRNA. {ECO:0000255 HAMAP-Rule:MF_00480; Biological process: translation [GO:0006412]; Cellular component: small ribosomal subunit [GO:0015935]; Associated terms: small ribosomal subunit [GO:0015935]; rRNA binding [GO:0019843]; structural constituent of ribosome [GO:0003735]; tRNA binding [GO:0000049]; translation [GO:0006412]; Molecular function: rRNA binding [GO:0019843]; structural constituent of ribosome [GO:0003735]; tRNA binding [GO:0000049]; Keywords: RNA-binding; Ribonucleoprotein; Ribosomal protein; rRNA-binding; tRNA-binding; Protein families: Universal ribosomal protein uS7 family</p>                                                                                                                                           |
| rpsN | Q8YQ66 | 100 | <p>30S ribosomal protein S14; Function: Binds 16S rRNA, required for the assembly of 30S particles and may also be responsible for determining the conformation of the 16S rRNA at the A site. {ECO:0000255 HAMAP-Rule:MF_00537}; Probably participates in protein translocation into and across both the cytoplasmic and thylakoid membranes in cyanobacterial cells. {ECO:0000255 HAMAP-Rule:MF_01382}; Subcellular location: Cell inner membrane {ECO:0000255 HAMAP-Rule:MF_01382}; Peripheral membrane protein {ECO:0000255 HAMAP-Rule:MF_01382}; Cytoplasmic side {ECO:0000255 HAMAP-Rule:MF_01382}. Cellular thylakoid membrane {ECO:0000255 HAMAP-Rule:MF_01382}; Peripheral membrane protein {ECO:0000255 HAMAP-Rule:MF_01382}; Cytoplasmic side {ECO:0000255 HAMAP-Rule:MF_01382}. Cytoplasm {ECO:0000255 HAMAP-Rule:MF_01382}; Biological process: translation [GO:0006412]; Cellular component: ribosome [GO:0005840]; Associated terms: ribosome [GO:0005840]; rRNA binding [GO:0019843]; structural constituent of ribosome [GO:0003735];</p> |

|                |          |        |     |                                                                                                                                                                                                                                                                                                                                                                                                                                                                                                                                                                                                                                                                                                                                                                                                                                                                                                                                                                                                                                                                                                                                                                                             |
|----------------|----------|--------|-----|---------------------------------------------------------------------------------------------------------------------------------------------------------------------------------------------------------------------------------------------------------------------------------------------------------------------------------------------------------------------------------------------------------------------------------------------------------------------------------------------------------------------------------------------------------------------------------------------------------------------------------------------------------------------------------------------------------------------------------------------------------------------------------------------------------------------------------------------------------------------------------------------------------------------------------------------------------------------------------------------------------------------------------------------------------------------------------------------------------------------------------------------------------------------------------------------|
|                |          |        |     | translation [GO:0006412]; Molecular function: rRNA binding [GO:0019843]; structural constituent of ribosome [GO:0003735]; Keywords: RNA-binding; Ribonucleoprotein; Ribosomal protein; rRNA-binding; Protein families: Universal ribosomal protein uS14 family                                                                                                                                                                                                                                                                                                                                                                                                                                                                                                                                                                                                                                                                                                                                                                                                                                                                                                                              |
|                | secA     | Q8YMS8 | 930 | Protein translocase subunit SecA; Function: Part of the Sec protein translocase complex. Interacts with the SecYEG preprotein conducting channel. Has a central role in coupling the hydrolysis of ATP to the transfer of proteins into and across the cell membrane, serving as an ATP-driven molecular motor driving the stepwise translocation of polypeptide chains across the membrane. {ECO:0000255 HAMAP-Rule:MF_01382}; Biological process: intracellular protein transmembrane transport [GO:0065002]; protein import [GO:0017038]; protein targeting [GO:0006605]; Cellular component: cytoplasm [GO:0005737]; plasma membrane [GO:0005886]; thylakoid membrane [GO:0042651]; Associated terms: cytoplasm [GO:0005737]; plasma membrane [GO:0005886]; thylakoid membrane [GO:0042651]; ATP binding [GO:0005524]; intracellular protein transmembrane transport [GO:0065002]; protein import [GO:0017038]; protein targeting [GO:0006605]; Molecular function: ATP binding [GO:0005524]; Keywords: ATP-binding; Cell inner membrane; Cell membrane; Cytoplasm; Membrane; Nucleotide-binding; Protein transport; Thylakoid; Translocation; Transport; Protein families: SecA family |
| Photosynthesis | all7255  | Q8YKN8 | 499 | Zeta-carotene desaturase; Transmembrane; Biological process: carotenoid biosynthetic process [GO:0016117]; Associated terms: oxidoreductase activity [GO:0016491]; carotenoid biosynthetic process [GO:0016117]; Molecular function: oxidoreductase activity [GO:0016491]; Domain features: DOMAIN 13-474; note="Amino_oxidase"; evidence="ECO:0000259 Pfam:PF01593" Keywords: Carotenoid biosynthesis; Oxidoreductase; Plasmid; Protein families: Carotenoid/retinoid oxidoreductase family                                                                                                                                                                                                                                                                                                                                                                                                                                                                                                                                                                                                                                                                                                |
|                | all7348* | Q8YKF0 | 460 | All7348 protein; Subcellular location: Cellular thylakoid membrane {ECO:0000250}; Peripheral membrane protein {ECO:0000250}; Cytoplasmic side {ECO:0000250}. Note=Anchors the phycobilisome perpendicularly to the cytoplasmic surface of the thylakoid membrane. {ECO:0000250}; Cellular component: integral component of membrane [GO:0016021]; Associated terms: integral component of membrane [GO:0016021]; 2 iron, 2 sulfur cluster binding [GO:0051537]; chlorophyllide a oxygenase                                                                                                                                                                                                                                                                                                                                                                                                                                                                                                                                                                                                                                                                                                  |

|       |        |      |                                                                                                                                                                                                                                                                                                                                                                                                                                                                                                                                                                                                                                                                                                                                                                                                                                                                                                                                                                                                                                                                                                                                                                                                                                                                                                                                                                                                                                                                                                                                                                                                                                                                                                                                                                                                                                                              |
|-------|--------|------|--------------------------------------------------------------------------------------------------------------------------------------------------------------------------------------------------------------------------------------------------------------------------------------------------------------------------------------------------------------------------------------------------------------------------------------------------------------------------------------------------------------------------------------------------------------------------------------------------------------------------------------------------------------------------------------------------------------------------------------------------------------------------------------------------------------------------------------------------------------------------------------------------------------------------------------------------------------------------------------------------------------------------------------------------------------------------------------------------------------------------------------------------------------------------------------------------------------------------------------------------------------------------------------------------------------------------------------------------------------------------------------------------------------------------------------------------------------------------------------------------------------------------------------------------------------------------------------------------------------------------------------------------------------------------------------------------------------------------------------------------------------------------------------------------------------------------------------------------------------|
|       |        |      | [overall] activity [GO:0010277]; Molecular function: 2 iron, 2 sulfur cluster binding [GO:0051537]; chlorophyllide a oxygenase [overall] activity [GO:0010277]; Domain features: DOMAIN 11-122; note="Rieske"; evidence="ECO:0000259 PROSITE:PS51296" Keywords: Membrane; Plasmid; Transmembrane; Transmembrane helix                                                                                                                                                                                                                                                                                                                                                                                                                                                                                                                                                                                                                                                                                                                                                                                                                                                                                                                                                                                                                                                                                                                                                                                                                                                                                                                                                                                                                                                                                                                                        |
| apcE* | P80559 | 1132 | Phycobiliprotein ApcE (Anchor polypeptide) (PBS-anchor protein) (Phycobilisome linker polypeptide); Function: This protein is postulated to act both as terminal energy acceptor (by its phycobin-like domains) and as a linker polypeptide (by its repeats and arms) that stabilizes the phycobilisome core architecture. Has intrinsic bilin lyase activity (By similarity). {ECO:0000250}; Linker polypeptides determine the state of aggregation and the location of the disk-shaped phycobiliprotein units within the phycobilisome and modulate their spectroscopic properties in order to mediate a directed and optimal energy transfer. {ECO:0000250}; Subcellular location: Cellular thylakoid membrane {ECO:0000250}; Peripheral membrane protein {ECO:0000250}; Cytoplasmic side {ECO:0000250}; Biological process: oxidation-reduction process [GO:0055114]; photosynthesis [GO:0015979]; protein-chromophore linkage [GO:0018298]; Cellular component: phycobilisome [GO:0030089]; Associated terms: phycobilisome [GO:0030089]; lyase activity [GO:0016829]; oxidation-reduction process [GO:0055114]; photosynthesis [GO:0015979]; protein-chromophore linkage [GO:0018298]; Molecular function: lyase activity [GO:0016829]; Domain features: DOMAIN 253-433; note="PBS-linker 1"; evidence="ECO:0000255 PROSITE-ProRule:PRU00775"; DOMAIN 514-692; note="PBS-linker 2"; evidence="ECO:0000255 PROSITE-ProRule:PRU00775"; DOMAIN 709-887; note="PBS-linker 3"; evidence="ECO:0000255 PROSITE-ProRule:PRU00775"; DOMAIN 940-1121; note="PBS-linker 4"; evidence="ECO:0000255 PROSITE-ProRule:PRU00775" Keywords: 3D-structure; Bile pigment; Chromophore; Direct protein sequencing; Electron transport; Lyase; Membrane; Photosynthesis; Phycobilisome; Repeat; Thylakoid; Transport; Protein families: Phycobilisome linker protein family |
| cpcG3 | P29988 | 237  | Phycobilisome rod-core linker polypeptide CpcG3 (L-RC 27.2); Function: Rod-core linker protein required for attachment of phycocyanin to allophycocyanin in cores of                                                                                                                                                                                                                                                                                                                                                                                                                                                                                                                                                                                                                                                                                                                                                                                                                                                                                                                                                                                                                                                                                                                                                                                                                                                                                                                                                                                                                                                                                                                                                                                                                                                                                         |

|       |            |     |  |                                                                                                                                                                                                                                                                                                                                                                                                                                                                                                                                                                                                                                                                                                                                                                                                                                                                                                                                                                                                                                                                                                                                                                                                                                                                                                                                                                                                                                                                                                                                                                                                                                                                                                                                                 |
|-------|------------|-----|--|-------------------------------------------------------------------------------------------------------------------------------------------------------------------------------------------------------------------------------------------------------------------------------------------------------------------------------------------------------------------------------------------------------------------------------------------------------------------------------------------------------------------------------------------------------------------------------------------------------------------------------------------------------------------------------------------------------------------------------------------------------------------------------------------------------------------------------------------------------------------------------------------------------------------------------------------------------------------------------------------------------------------------------------------------------------------------------------------------------------------------------------------------------------------------------------------------------------------------------------------------------------------------------------------------------------------------------------------------------------------------------------------------------------------------------------------------------------------------------------------------------------------------------------------------------------------------------------------------------------------------------------------------------------------------------------------------------------------------------------------------|
|       |            |     |  | <p>phycobilisomes. {ECO:0000250}; Subcellular location: Cellular thylakoid membrane {ECO:0000255 HAMAP-Rule:MF_01351}; Peripheral membrane protein {ECO:0000255 HAMAP-Rule:MF_01351}; Biological process: photosynthesis [GO:0015979]; Cellular component: phycobilisome [GO:0030089]; Associated terms: phycobilisome [GO:0030089]; photosynthesis [GO:0015979]; Domain features: DOMAIN 11-191; note="PBS-linker"; evidence="ECO:0000255 PROSITE-ProRule:PRU00775" Keywords: Membrane; Photosynthesis; Phycobilisome; Thylakoid; Protein families: Phycobilisome linker protein family</p>                                                                                                                                                                                                                                                                                                                                                                                                                                                                                                                                                                                                                                                                                                                                                                                                                                                                                                                                                                                                                                                                                                                                                    |
| ndhI  | Q9WWM<br>6 | 194 |  | <p>NAD(P)H-quinone oxidoreductase subunit I (EC 7.1.1.-) (NAD(P)H dehydrogenase I subunit I) (NDH-1 subunit I) (NDH-I); Function: NDH-1 shuttles electrons from an unknown electron donor, via FMN and iron-sulfur (Fe-S) centers, to quinones in the respiratory and/or the photosynthetic chain. The immediate electron acceptor for the enzyme in this species is believed to be plastoquinone. Couples the redox reaction to proton translocation, and thus conserves the redox energy in a proton gradient. {ECO:0000255 HAMAP-Rule:MF_01351}; Subcellular location: Cellular thylakoid membrane {ECO:0000250}; Peripheral membrane protein {ECO:0000250}; Cytoplasmic side {ECO:0000250}. Note=Forms the periphery of the phycobilisome rod. {ECO:0000250}; Biological process: photosynthesis, light reaction [GO:0019684]; Cellular component: thylakoid membrane [GO:0042651]; Associated terms: thylakoid membrane [GO:0042651]; 4 iron, 4 sulfur cluster binding [GO:0051539]; iron ion binding [GO:0005506]; NADH dehydrogenase (ubiquinone) activity [GO:0008137]; quinone binding [GO:0048038]; photosynthesis, light reaction [GO:0019684]; Molecular function: 4 iron, 4 sulfur cluster binding [GO:0051539]; iron ion binding [GO:0005506]; NADH dehydrogenase (ubiquinone) activity [GO:0008137]; quinone binding [GO:0048038]; Domain features: DOMAIN 55-84; note="4Fe-4S ferredoxin-type 1"; evidence="ECO:0000255 HAMAP-Rule:MF_01351"; DOMAIN 95-124; note="4Fe-4S ferredoxin-type 2"; evidence="ECO:0000255 HAMAP-Rule:MF_01351" Keywords: 4Fe-4S; Iron; Iron-sulfur; Membrane; Metal-binding; NAD; NADP; Plastoquinone; Quinone; Repeat; Thylakoid; Translocase; Protein families: Complex I 23 kDa subunit family</p> |
| pecA* | P35796     | 162 |  | <p>Phycocerythrocyanin alpha chain; Function: Light-</p>                                                                                                                                                                                                                                                                                                                                                                                                                                                                                                                                                                                                                                                                                                                                                                                                                                                                                                                                                                                                                                                                                                                                                                                                                                                                                                                                                                                                                                                                                                                                                                                                                                                                                        |

|      |        |     |                                                                                                                                                                                                                                                                                                                                                                                                                                                                                                                                                                                                                                                                                                                                                                                                                                                   |
|------|--------|-----|---------------------------------------------------------------------------------------------------------------------------------------------------------------------------------------------------------------------------------------------------------------------------------------------------------------------------------------------------------------------------------------------------------------------------------------------------------------------------------------------------------------------------------------------------------------------------------------------------------------------------------------------------------------------------------------------------------------------------------------------------------------------------------------------------------------------------------------------------|
|      |        |     | <p>harvesting photosynthetic bile pigment-protein from the phycobiliprotein complex; Subcellular location: Cellular thylakoid membrane {ECO:0000250}; Peripheral membrane protein {ECO:0000250}; Cytoplasmic side {ECO:0000250}. Note=Forms the periphery of the phycobilisome rod. {ECO:0000250}; Biological process: oxidation-reduction process [GO:0055114]; photosynthesis [GO:0015979]; protein-chromophore linkage [GO:0018298]; Cellular component: phycobilisome [GO:0030089]; Associated terms: phycobilisome [GO:0030089]; oxidation-reduction process [GO:0055114]; photosynthesis [GO:0015979]; protein-chromophore linkage [GO:0018298]; Keywords: Bile pigment; Chromophore; Electron transport; Membrane; Photosynthesis; Phycobilisome; Thylakoid; Transport; Protein families: Phycobiliprotein family</p>                      |
| pecB | P35797 | 172 | <p>Phycocerythrocyanin subunit beta; Function: Light-harvesting photosynthetic bile pigment-protein from the phycobiliprotein complex; Subcellular location: Cellular thylakoid membrane; Peripheral membrane protein; Cytoplasmic side. Note=This protein occurs in the rod, it is associated with phycoerythrocyanin; Biological process: oxidation-reduction process [GO:0055114]; photosynthesis [GO:0015979]; protein-chromophore linkage [GO:0018298]; Cellular component: phycobilisome [GO:0030089]; Associated terms: phycobilisome [GO:0030089]; oxidation-reduction process [GO:0055114]; photosynthesis [GO:0015979]; protein-chromophore linkage [GO:0018298]; Keywords: Bile pigment; Chromophore; Electron transport; Membrane; Photosynthesis; Phycobilisome; Thylakoid; Transport; Protein families: Phycobiliprotein family</p> |
| pecC | P31329 | 278 | <p>Phycobilisome 34.5 kDa linker polypeptide, phycoerythrocyanin-associated, rod; Function: Rod linker protein, associated with phycoerythrocyanin. Linker polypeptides determine the state of aggregation and the location of the disk-shaped phycobiliprotein units within the phycobilisome and modulate their spectroscopic properties in order to mediate a directed and optimal energy transfer; Subcellular location: Cellular thylakoid membrane {ECO:0000250}; Multi-pass membrane protein {ECO:0000250}; Transmembrane; Biological process: photosynthesis [GO:0015979]; Cellular component: phycobilisome [GO:0030089]; Associated terms: phycobilisome [GO:0030089]; photosynthesis [GO:0015979]; Domain features: DOMAIN 2-178;</p>                                                                                                  |

|         |        |     |                                                                                                                                                                                                                                                                                                                                                                                                                                                                                                                                                                                                                                                                                                                                                                                                                                                                                                                                                                                                                                                                                                          |
|---------|--------|-----|----------------------------------------------------------------------------------------------------------------------------------------------------------------------------------------------------------------------------------------------------------------------------------------------------------------------------------------------------------------------------------------------------------------------------------------------------------------------------------------------------------------------------------------------------------------------------------------------------------------------------------------------------------------------------------------------------------------------------------------------------------------------------------------------------------------------------------------------------------------------------------------------------------------------------------------------------------------------------------------------------------------------------------------------------------------------------------------------------------|
|         |        |     | note="PBS-linker"; evidence="ECO:0000255 PROSITE-ProRule:PRU00775"; DOMAIN 226-278; note="CpcD-like"; evidence="ECO:0000255 PROSITE-ProRule:PRU00771" Keywords: Direct protein sequencing; Membrane; Photosynthesis; Phycobilisome; Thylakoid; Protein families: Phycobilisome linker protein family                                                                                                                                                                                                                                                                                                                                                                                                                                                                                                                                                                                                                                                                                                                                                                                                     |
| alr1129 | Q8YXT2 | 325 | Alr1129 protein; Domain features: DOMAIN 5-76; note="PRC"; evidence="ECO:0000259 Pfam:PF05239"; DOMAIN 85-163; note="PRC"; evidence="ECO:0000259 Pfam:PF05239"                                                                                                                                                                                                                                                                                                                                                                                                                                                                                                                                                                                                                                                                                                                                                                                                                                                                                                                                           |
| psaL    | P58577 | 172 | Photosystem I reaction center subunit XI (PSI subunit V) (PSI-L); Subcellular location: Cellular thylakoid membrane {ECO:0000255 HAMAP-Rule:MF_01495}; Multi-pass membrane protein {ECO:0000255 HAMAP-Rule:MF_01495}; Transmembrane; Biological process: photosynthesis [GO:0015979]; Cellular component: integral component of membrane [GO:0016021]; photosystem I reaction center [GO:0009538]; thylakoid membrane [GO:0042651]; Associated terms: integral component of membrane [GO:0016021]; photosystem I reaction center [GO:0009538]; thylakoid membrane [GO:0042651]; photosynthesis [GO:0015979]; Keywords: 3D-structure; Membrane; Photosynthesis; Photosystem I; Thylakoid; Transmembrane; Transmembrane helix; Protein families: PsaL family                                                                                                                                                                                                                                                                                                                                               |
| psbB    | P20093 | 509 | Photosystem II CP47 reaction center protein (PSII 47 kDa protein) (Protein CP-47); Function: One of the components of the core complex of photosystem II (PSII). It binds chlorophyll and helps catalyze the primary light-induced photochemical processes of PSII. PSII is a light-driven water: plastoquinone oxidoreductase, using light energy to abstract electrons from H(2)O, generating O(2) and a proton gradient subsequently used for ATP formation. {ECO:0000255 HAMAP-Rule:MF_01495}; Biological process: photosynthetic electron transport in photosystem II [GO:0009772]; protein-chromophore linkage [GO:0018298]; Cellular component: integral component of membrane [GO:0016021]; photosystem II [GO:0009523]; thylakoid membrane [GO:0042651]; Associated terms: integral component of membrane [GO:0016021]; photosystem II [GO:0009523]; thylakoid membrane [GO:0042651]; chlorophyll binding [GO:0016168]; electron transporter, transferring electrons within the cyclic electron transport pathway of photosynthesis activity [GO:0045156]; photosynthetic electron transport in |

|                                           |          |        |                                    |                                                                                                                                                                                                                                                                                                                                                                                                                                                 |
|-------------------------------------------|----------|--------|------------------------------------|-------------------------------------------------------------------------------------------------------------------------------------------------------------------------------------------------------------------------------------------------------------------------------------------------------------------------------------------------------------------------------------------------------------------------------------------------|
|                                           |          |        |                                    | photosystem II [GO:0009772]; protein-chromophore linkage [GO:0018298]; Molecular function: chlorophyll binding [GO:0016168]; electron transporter, transferring electrons within the cyclic electron transport pathway of photosynthesis activity [GO:0045156]; Keywords: Chlorophyll; Chromophore; Membrane; Photosynthesis; Photosystem II; Thylakoid; Transmembrane; Transmembrane helix; Protein families: PsbB/PsbC family, PsbB subfamily |
| No clustered<br>Signal domine<br>proteins | all0050* | Q8Z0P0 | 345                                | All0050 protein; Keywords: Signal                                                                                                                                                                                                                                                                                                                                                                                                               |
|                                           | all1755  | Q8YW61 | 132                                | All1755 protein; Keywords: Signal                                                                                                                                                                                                                                                                                                                                                                                                               |
|                                           | all1783* | Q8YW33 | 201                                | All1783 protein; Keywords: Signal                                                                                                                                                                                                                                                                                                                                                                                                               |
|                                           | all4130  | Q8YPR2 | 301                                | Binding protein of ABC transporter component; Domain features: DOMAIN 36-269; note="PBPb"; evidence="ECO:0000259 SMART:SM00062" Keywords: Signal                                                                                                                                                                                                                                                                                                |
|                                           | alr0490  | Q8YZH0 | 225                                | Alr0490 protein; Keywords: Signal                                                                                                                                                                                                                                                                                                                                                                                                               |
|                                           | alr1548  | Q8YWQ6 | 312                                | Alr1548 protein; Domain features: DOMAIN 214-281; note="TPR_REGION"; evidence="ECO:0000259 PROSITE:PS50293" Keywords: Coiled coil; Signal                                                                                                                                                                                                                                                                                                       |
|                                           | alr3932  | Q8YQA1 | 231                                | Alr3932 protein; Keywords: Signal                                                                                                                                                                                                                                                                                                                                                                                                               |
|                                           | alr7326  | Q8YKH2 | 173                                | Alr7326 protein; Keywords: Plasmid; Signal                                                                                                                                                                                                                                                                                                                                                                                                      |
|                                           | alr7345  | Q8YKF3 | 303                                | Alr7345 protein; Associated terms: methyltransferase activity [GO:0008168]; Molecular function: methyltransferase activity [GO:0008168]; Domain features: DOMAIN 142-201; note="Methyltransf_11"; evidence="ECO:0000259 Pfam:PF08241" Keywords: Plasmid; Signal                                                                                                                                                                                 |
|                                           | all2086  | Q8YV95 | 564                                | All2086 protein                                                                                                                                                                                                                                                                                                                                                                                                                                 |
|                                           | all2262  | Q8YUS2 | 142                                | All2262 protein; Keywords: Coiled coil                                                                                                                                                                                                                                                                                                                                                                                                          |
|                                           | all2480  | Q8YU74 | 283                                | Beta-lactamase; Associated terms: penicillin binding [GO:0008658]; Molecular function: penicillin binding [GO:0008658]; Domain features: DOMAIN 64-274; note="Transpeptidase"; evidence="ECO:0000259 Pfam:PF00905" Keywords: 3D-structure                                                                                                                                                                                                       |
|                                           | all2965* | Q8YSW4 | 162                                | All2965 protein                                                                                                                                                                                                                                                                                                                                                                                                                                 |
|                                           | alr0436  | Q8YZM1 | 470                                | Alr0436 protein                                                                                                                                                                                                                                                                                                                                                                                                                                 |
|                                           | alr4359  | Q8YP41 | 418                                | Alr4359 protein; Domain features: DOMAIN 43-215; note="VWFA"; evidence="ECO:0000259 PROSITE:PS50234"                                                                                                                                                                                                                                                                                                                                            |
| alr7233                                   | Q8YKR0   | 341    | Alr7233 protein; Keywords: Plasmid |                                                                                                                                                                                                                                                                                                                                                                                                                                                 |
| alr7300                                   | Q8YKJ5   | 269    | Alr7300 protein; Keywords: Plasmid |                                                                                                                                                                                                                                                                                                                                                                                                                                                 |

|  |              |        |     |                                    |
|--|--------------|--------|-----|------------------------------------|
|  | alr7312<br>* | Q8YKI5 | 383 | Alr7312 protein; Keywords: Plasmid |
|--|--------------|--------|-----|------------------------------------|

## Figure 1B specific information:

### FTIR peaks specific information

The FTIR spectra present the characteristic bands of PS: C–H stretching vibration ( $3070\text{ cm}^{-1}$  and  $3028\text{ cm}^{-1}$ ), C–H<sub>2</sub> stretching vibration ( $2924\text{ cm}^{-1}$  and  $2854\text{ cm}^{-1}$ ) and stretching ( $1646\text{ cm}^{-1}$ ,  $1556\text{ cm}^{-1}$ ,  $1456\text{ cm}^{-1}$ ) of the benzene ring;<sup>12</sup> G7: N–H stretching of primary and secondary amine groups stretching ( $3408\text{ cm}^{-1}$  and  $3292\text{ cm}^{-1}$ ), C–H stretching ( $2934\text{ cm}^{-1}$  and  $2866\text{ cm}^{-1}$ ), C = O stretching of primary amide ( $1650\text{ cm}^{-1}$ ) H–C–H asymmetric, N–H bending/C–N stretching secondary amide ( $1562\text{ cm}^{-1}$ ), H–C–H scissor ( $1452\text{ cm}^{-1}$ ), H–C–H asymmetric ( $1368\text{ cm}^{-1}$ ) and C–O stretching vibration ( $1060\text{ cm}^{-1}$ ).<sup>13</sup> The suspension containing both nanopolymers shows the characteristic peaks from each one: from PS the C–H stretching vibration ( $3086\text{ cm}^{-1}$  and  $3031\text{ cm}^{-1}$ ), C–H<sub>2</sub> stretching vibration ( $2924\text{ cm}^{-1}$  and  $2856\text{ cm}^{-1}$ ) and stretching of the benzene ring ( $1646\text{ cm}^{-1}$ ,  $1556\text{ cm}^{-1}$ ,  $1456\text{ cm}^{-1}$ ) and from the G7, N–H stretching of primary and secondary amine groups stretching ( $3408\text{ cm}^{-1}$  and  $3288\text{ cm}^{-1}$ ), C–H<sub>2</sub> stretching vibration shared with PS, C = O stretching of primary amide, N–H bending/C–N stretching secondary amide and H–C–H scissor (which three peaks overlapped with those corresponding to the benzene ring), H–C–H asymmetric ( $1368\text{ cm}^{-1}$ ) and C–O stretching vibration ( $1030\text{ cm}^{-1}$ ). Thus, the chemical surface of the aggregates rather than being homogeneous appear to present an irregular surface presenting region with characteristics corresponding to G7 and others corresponding to PS-NPs, which surface net charge prevails over the G7 positive charge due to its higher concentration and dimensions.

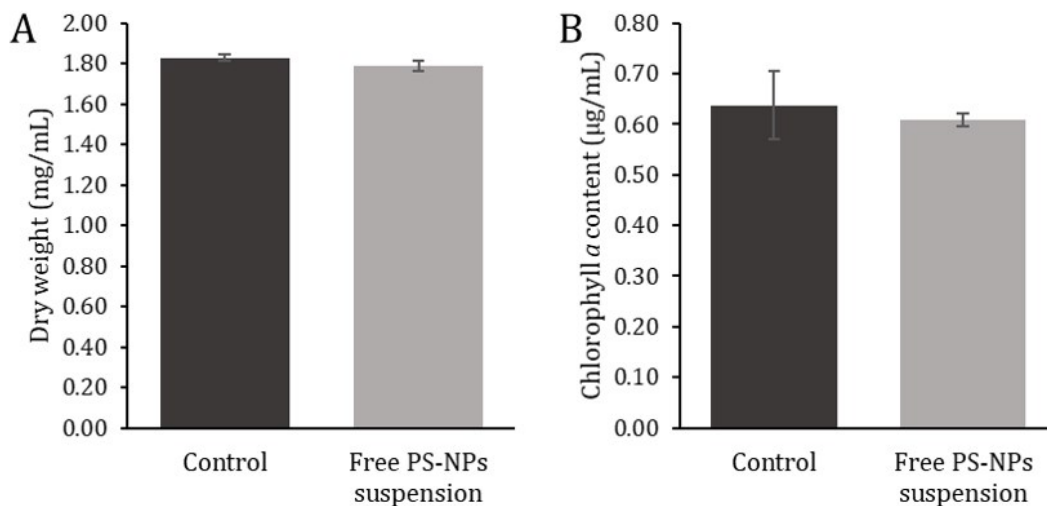



**Figure S1:** Effect of free PS-NPs suspension on *Anabaena* sp. PCC7120 growth for 72 h at  $\sim 65 \mu\text{mol photons m}^{-2} \text{s}^{-1}$  on a rotary shaker in AA/8 + N in terms of growth inhibition (A) and chlorophyll *a* content (B). Different letters indicate treatments that are significantly different (Tukey's HSD,  $p < 0.05$ ).

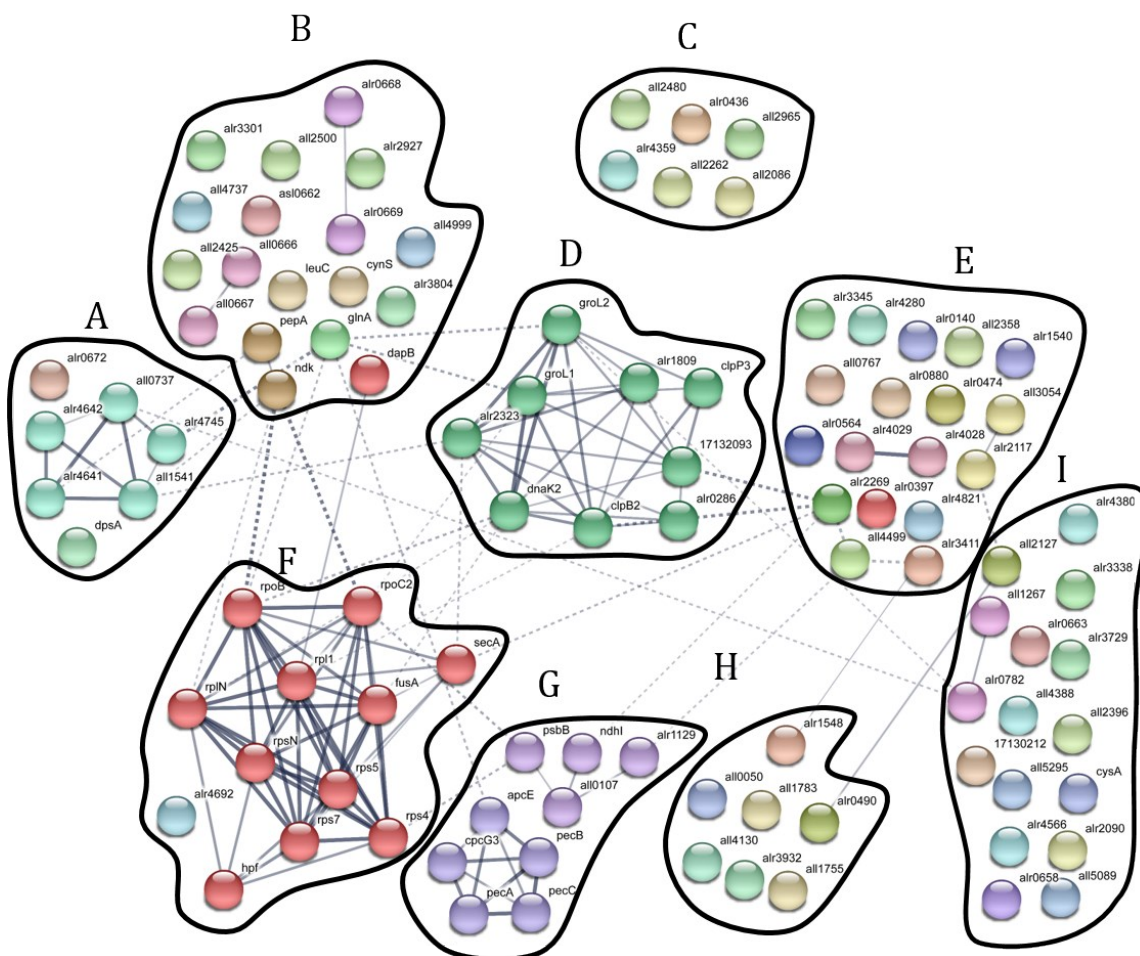

**Figure S2:** Protein-protein interaction network from STRING software clustered by MCL algorithm (inflation parameter = 3) complemented with Uniprot protein information. Proteins were allocated into 9 categories: Oxidative stress (A), Organo-nitrogen metabolism (B), No clustered proteins (C), Stress response (D), Surface location (E), Nucleic acid metabolism (F), Photosynthesis (G), Signal domain (H) and Carbon metabolism and energy (I).

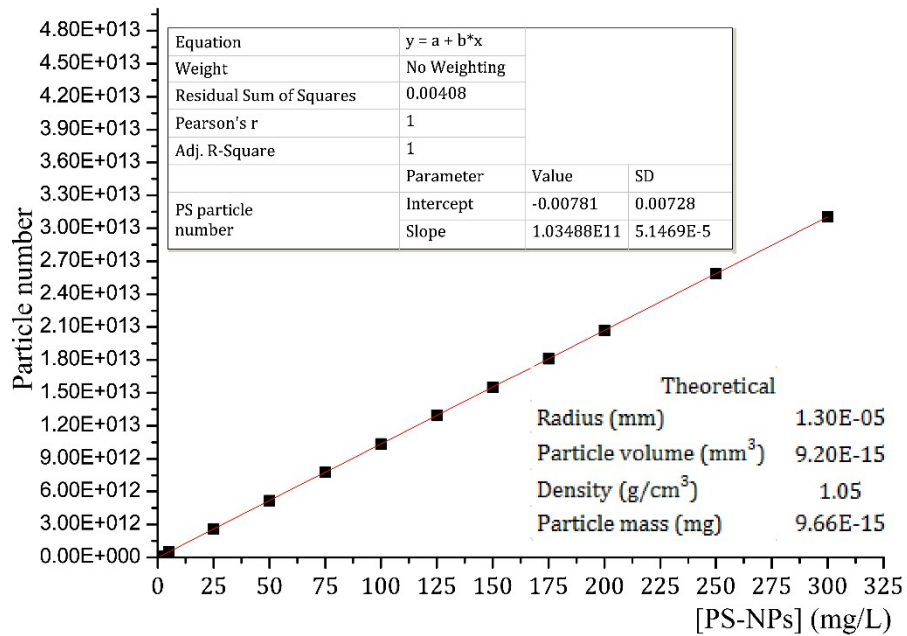

**Figure S3:** Theoretical linear regression between PS-NPs particle number and concentration as well as the correspondent related parameters.

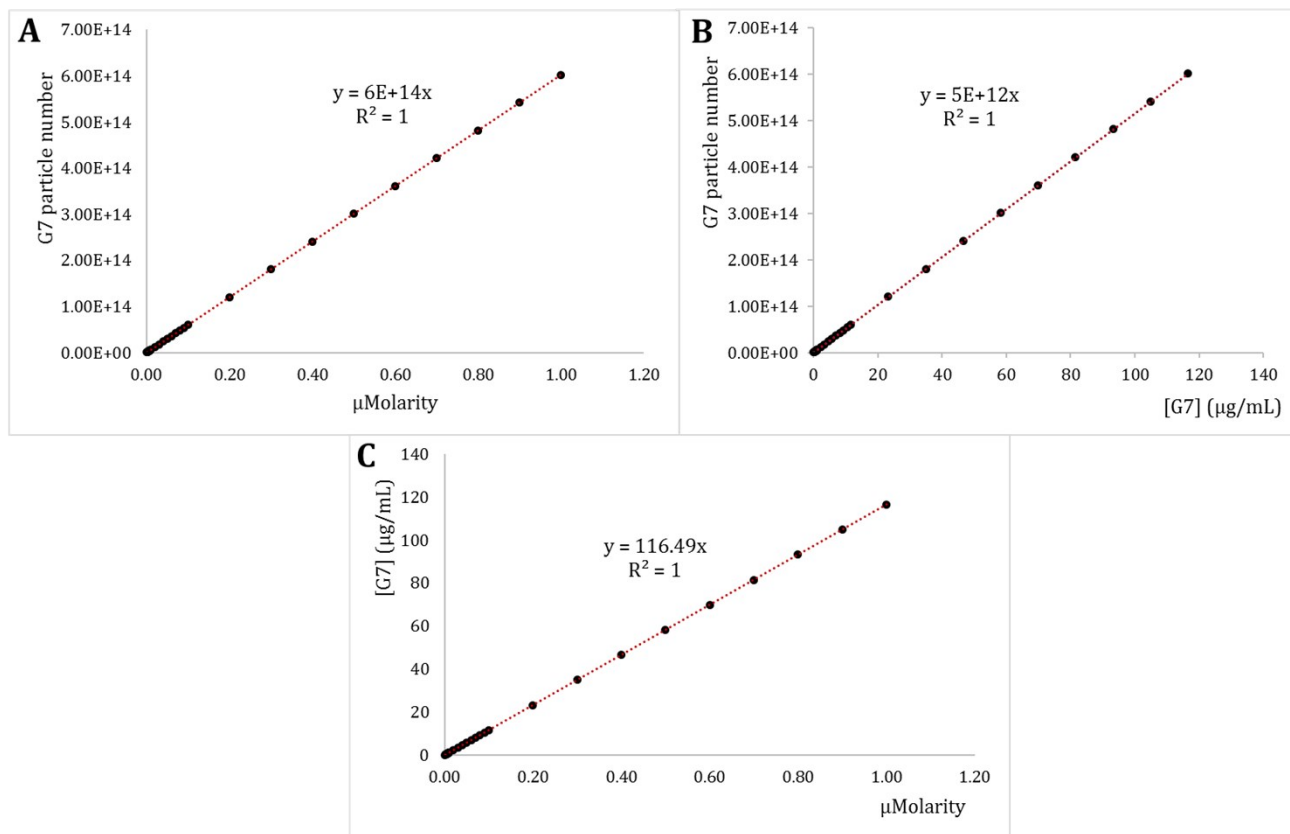

**Figure S4:** Theoretical linear regressions between G7 particle number and concentration (in term of  $\mu\text{M}$  or  $\text{mg/L}$ ) as well as the corresponding related parameters.

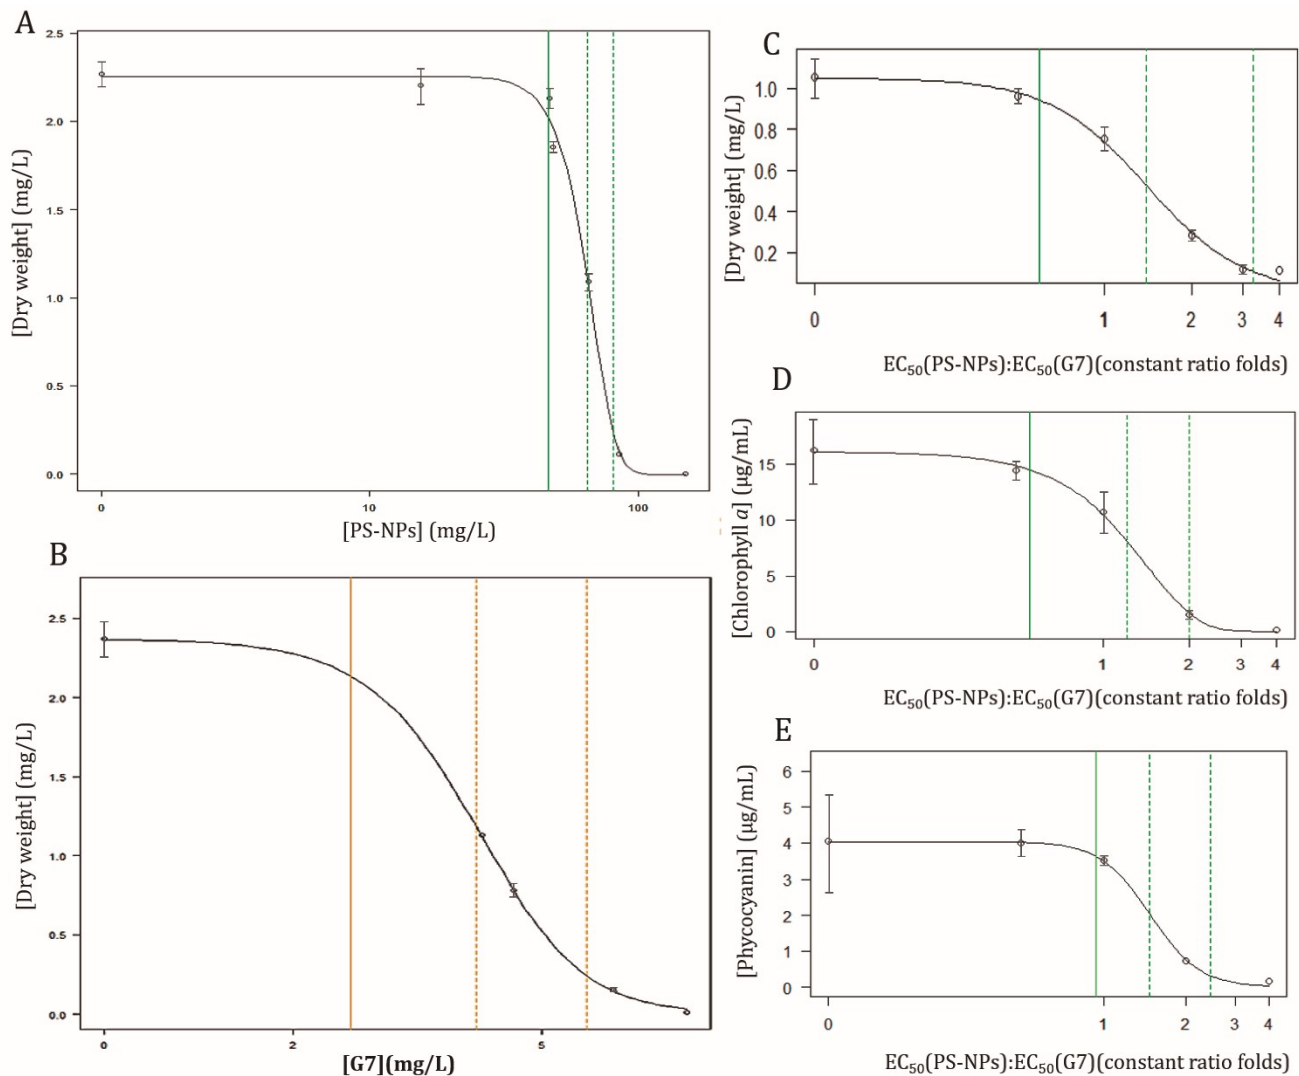

**Figure S5:** Individual dose-response curves (DRC) for growth inhibition of *Anabaena* exposed to PS-NPs (A) and G7 (B) for 72 h. Binary mixture DRC for growth inhibition (C), for chlorophyll *a* concentration (D) and for phycocyanin concentration decrease (E).

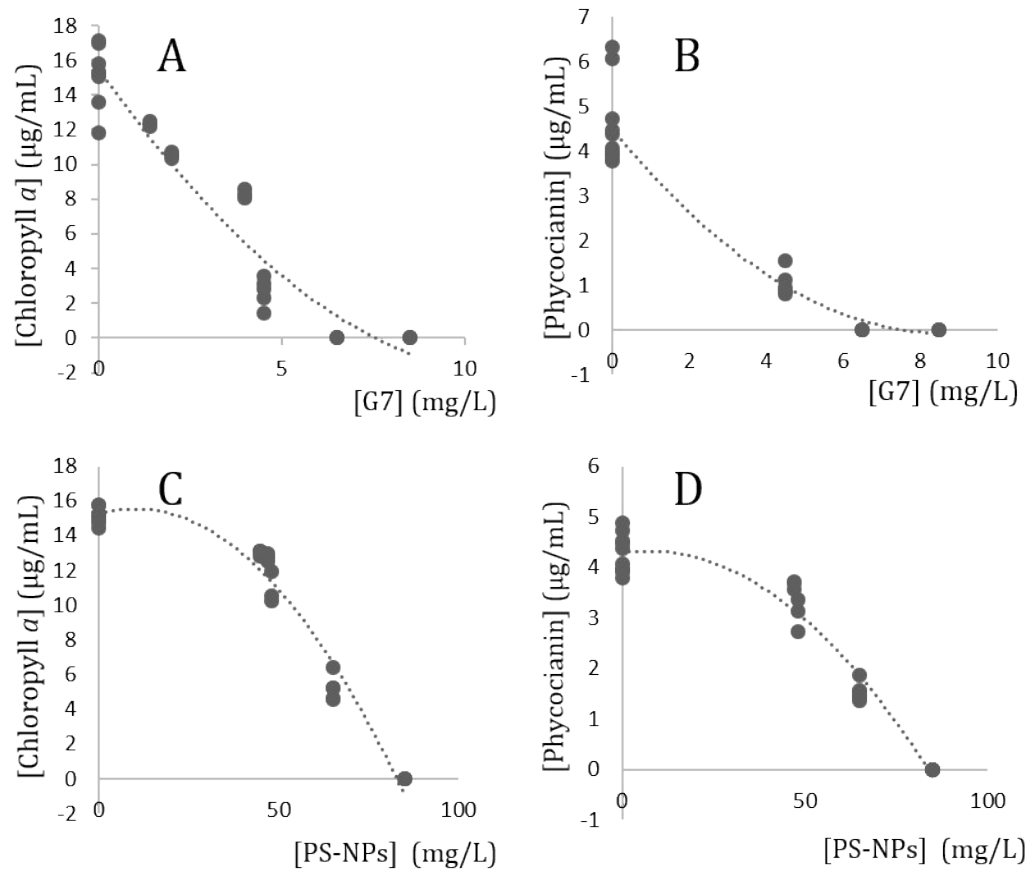

**Figure S6:** Dose-response curves (DRC) of *Anabaena* sp. PCC 7120 exposed to G7 PAMAM dendrimers (A, B), PS-NPs (C, D) and their mixture in the ratio 1:1 (EC<sub>50</sub> for growth inhibition) (E, F) in terms of chlorophyll *a* (A, C) and phycocyanin content (B, D).

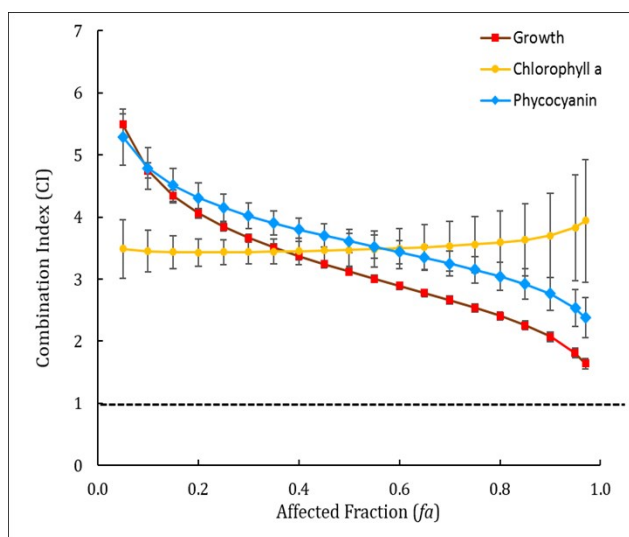

**Figure S7:** Combination index plot for binary combinations of PS-NPs and G7 in a constant ratio corresponding to the EC<sub>50</sub> of both nanoparticles for growth inhibition; CI values are plotted as a function

of the growth inhibition, decrease in chlorophyll a concentration and decrease in phycocyanin concentration (through all effect levels, fa). CI > 1 indicates antagonism and the dashed line additivity (CI = 1)

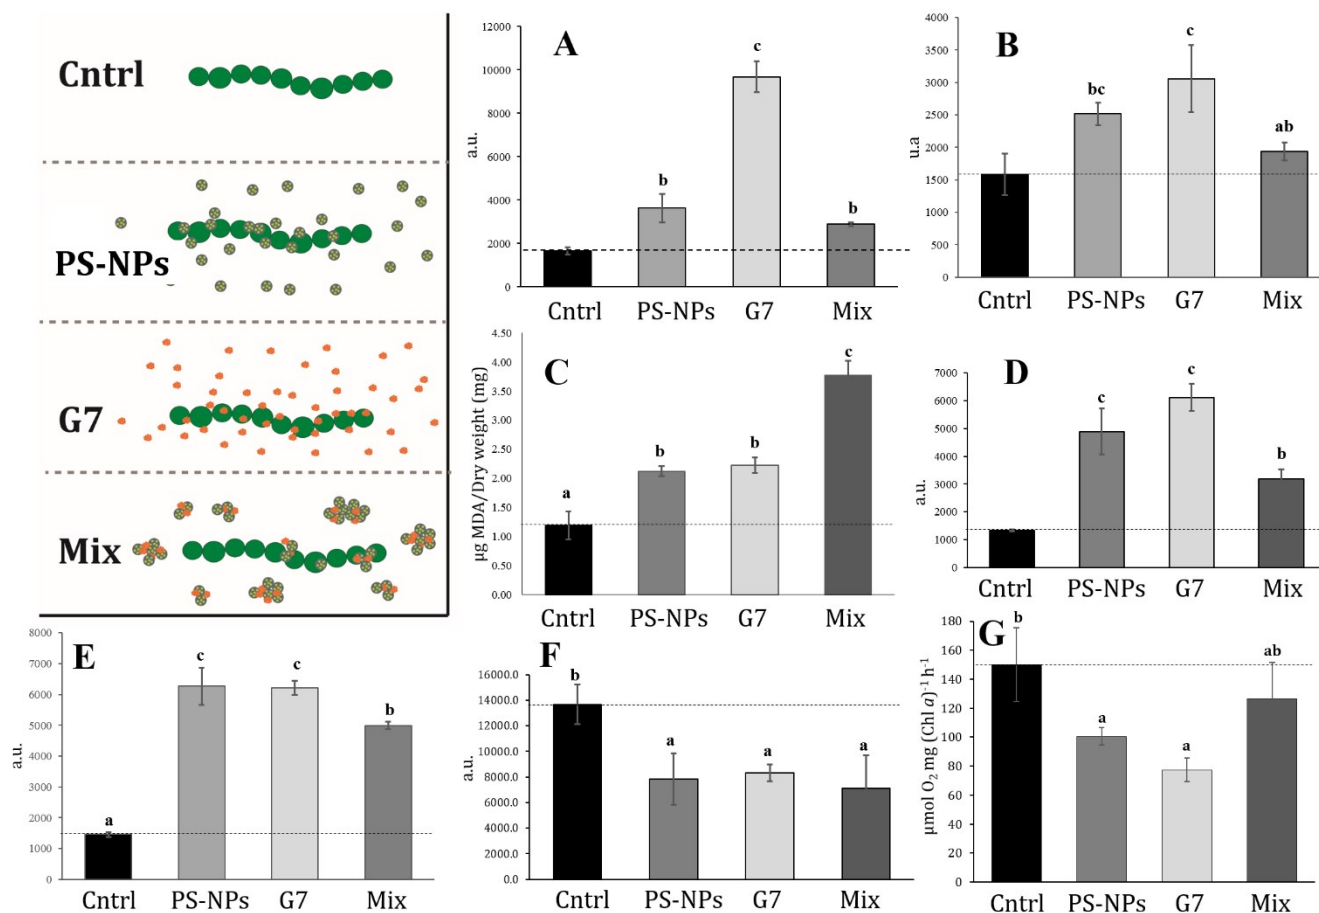

**Figure S8:** Physiological response of *Anabaena* sp. PCC7120 after its exposure to PAMAM dendrimer of generation 7 (G7) and polystyrene nanoparticles (PS-NPs), their mixture (Mix) and non-exposed cultures (Cntrl). Measurements were conducted by fluorimetry using a set of fluorochromes to evaluate: intracellular ROS formation by using 2 different fluorochromes [ $H_2DCF$  DA for general ROS formation (A), DHR 123 for  $H_2O_2$  formation (B)], lipid peroxidation (C) by quantification of TBARS, membrane integrity by propidium iodide (D), cytoplasmic membrane potential (E) by DiBAC<sub>4</sub>(3)), intracellular pH (F) by using BCECF AM and photosynthesis (G). Different letters indicate treatments that are significantly different (Tukey's HSD,  $p < 0.05$ ).

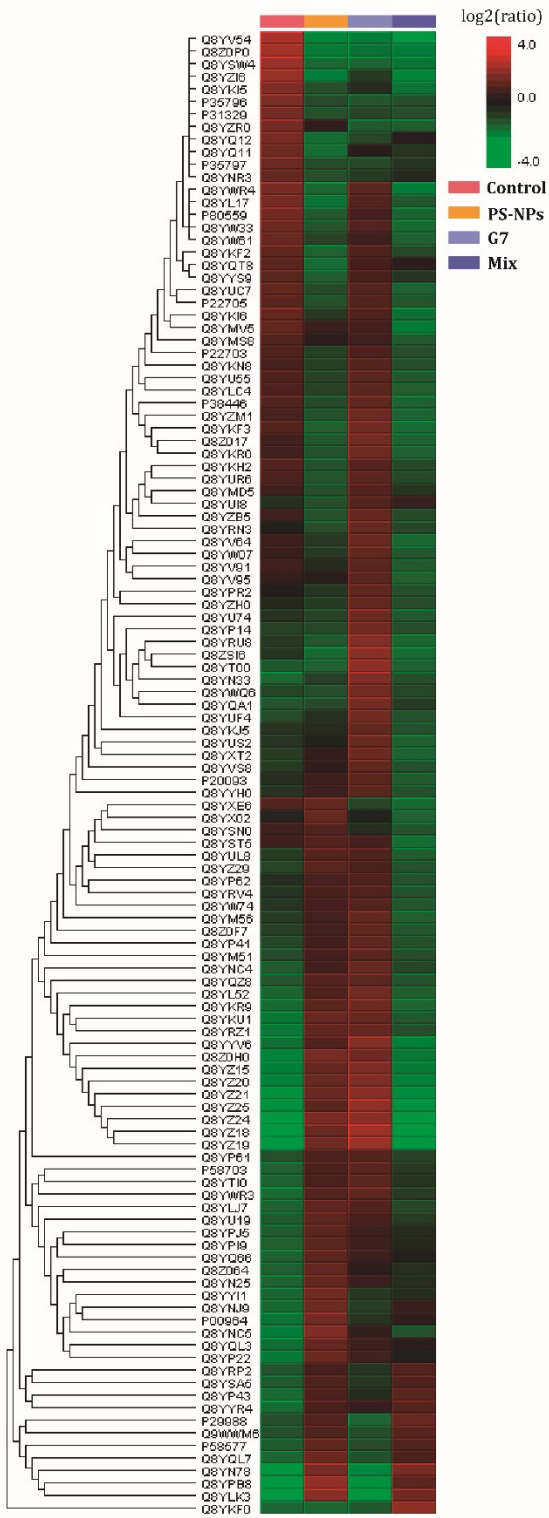

**Figure S9:** Heatmap with phylogenetic tree representing the proteomic response of *Anabaena* sp. PCC7120 in which at least one treatment induced significant change (FC <0.83 or >1.2, p <0.01) with respect to the control (p<0.01) after its exposure to PAMAM dendrimer of generation 7 (G7), polystyrene nanoparticles (PS-NPs) and the combination of both nanoparticles (Mix).

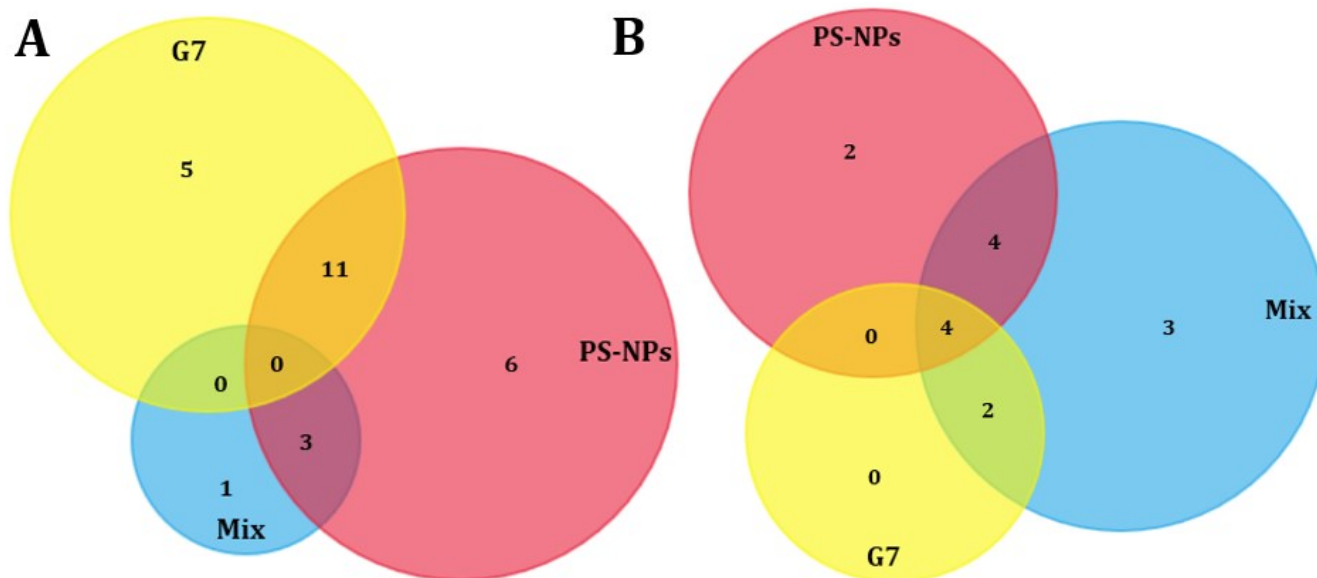

| Upregulated (A)   |         |         |             |              |          |                  |
|-------------------|---------|---------|-------------|--------------|----------|------------------|
| PS-NPs            | G7      | Mix     | PS-NPs & G7 | PS-NPs & Mix | G7 & Mix | PS-NPs, G7 & Mix |
| GlnA              | All7222 | All7348 | Alr0663     | All5295      | -        | -                |
| CcmK              | Alr7083 | -       | Alr0672     | Alr4692      | -        | -                |
| Alr4641           | All0737 | -       | Alr0668     | Alr4280      | -        | -                |
| Alr4566           | Alr2927 | -       | Alr0669     | -            | -        | -                |
| DpsA              | All4737 | -       | Alr4380     | -            | -        | -                |
| Alr3804           | -       | -       | Alr3301     | -            | -        | -                |
| -                 | -       | -       | Asl0662     | -            | -        | -                |
| -                 | -       | -       | Alr7200     | -            | -        | -                |
| -                 | -       | -       | All0667     | -            | -        | -                |
| -                 | -       | -       | CysA        | -            | -        | -                |
| -                 | -       | -       | All0666     | -            | -        | -                |
| Downregulated (B) |         |         |             |              |          |                  |
| PS-NPs            | G7      | Mix     | PS-NPs & G7 | PS-NPs & Mix | G7 & Mix | PS-NPs, G7 & Mix |
| Alr4029           | -       | All1783 | -           | ApcE         | PecA     | All0050          |
| Alr4028           | -       | Alr7311 | -           | All7121      | Alr0397  | All2965          |
| -                 | -       | Alr4821 | -           | Alr7312      | -        | Alr0474          |
|                   |         |         |             | Alr1540      |          | All2127          |

**Figure S10:** Venn diagram of DEPs upregulated (A) and downregulated (B) upon the exposure of *Anabaena* sp. PCC7120 for 72 h to PS-NPs, G7 and their combined exposure (Mix) (FC <0.5 or >2,  $p$  <0.01). The table shows the DEPs clustered based on the Venn diagram distribution.

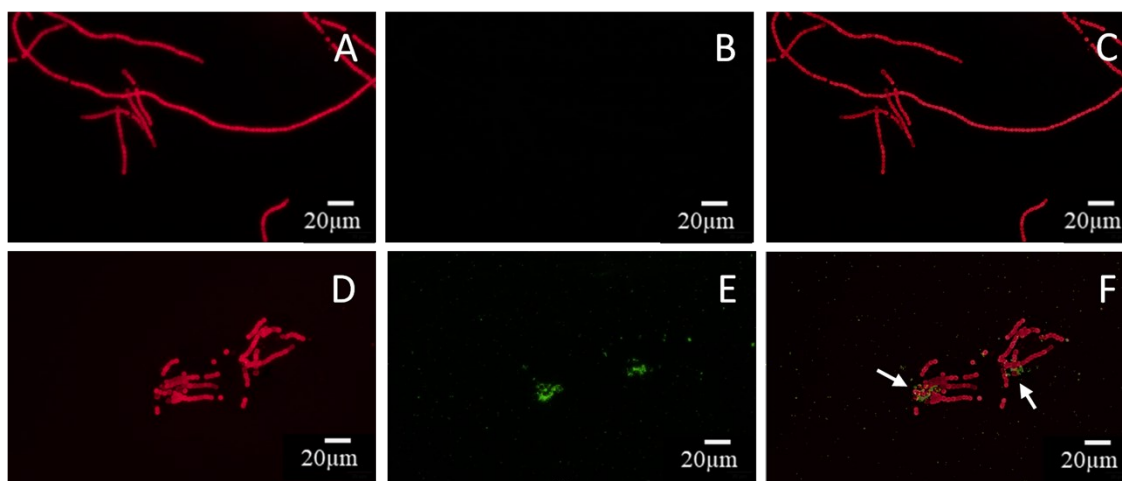

**Figure S11:** Fluorescence microscopy images (left to right): chlorophyll a fluorescence (red), PS-NPs fluorescence (green), and red/green fluorescence overlay. Images show *Anabaena* sp. PCC7120 cells after six days -control- (A, B, C) and *Anabaena* sp. PCC7120 cells after six days of exposure to the mixture PS-NPs + G7 (D, E, F). White arrows in the overlay images indicate heteroaggregates of PS-NPs and G7 adhered to sites of filament fragmentation.

## Bibliography

- 1 M. Moreno, J. Escobar, A. Izquierdo-álvarez, A. Gil, S. Pérez, J. Pereda, I. Zapico, M. Vento, L. Sabater, A. Marina, A. Martínez-ruiz and J. Sastre, Disulfide stress: a novel type of oxidative stress in acute pancreatitis, *Free Radic. Biol. Med.*, 2014, **70**, 265–277.
- 2 A. Shevchenko, M. Wilm, O. Vorm and M. Mann, Mass Spectrometric Sequencing of Proteins from Silver-Stained Polyacrylamide Gels, *Anal. Chem.*, 1996, **68**, 850–858.
- 3 X. Zhou, W. Xiao, Z. Su, J. Cheng, C. Zheng and Z. Zhang, Hippocampal Proteomic Alteration in Triple Transgenic Mouse Model of Alzheimer ' s Disease and Implication of PINK 1 Regulation in Donepezil Treatment, *J. Proteomics*, 2019, **18**, 1542–1552.
- 4 C. C. Clement, W. Wang, M. Dzieciatkowska, M. Cortese, K. C. Hansen, A. Bece, S. Thangaswamy, I. Nizamutdinova and J. Moon, Quantitative Profiling of the Lymph Node Clearance Capacity, *Sci. Rep.*, 2018, **8**, 1–16.
- 5 Y. Zou, P. Gong, W. Zhao, J. Zhang, X. Wu and C. Xin, Neurochemistry International Quantitative iTRAQ-based proteomic analysis of piperine protected cerebral ischemia / reperfusion injury in rat brain, *Neurochem. Int.*, 2019, **124**, 51–61.
- 6 V. C. Sein-echaluce, A. González, M. Napolitano, I. Luque, F. Barja, M. L. Peleato and M. F. Fillat, Zur ( FurB ) is a key factor in the control of the oxidative stress response in *Anabaena* sp . PCC 7120, *Environ. Microbiol.*, 2017, **17**, 2006–2017.



- 7 H. Jin, R. Kim and D. Bhaya, Deciphering proteolysis pathways for the error-prone DNA polymerase in cyanobacteria, *Environ. Microbiol.*, 2020, **00**, 1–13.
- 8 S. Moslavac, R. Bredemeier, O. Mirus, B. Granvogel, L. A. Eichacker and E. Schleiff, Proteomic Analysis of the Outer Membrane of *Anabaena* sp . Strain PCC 7120, *J. Proteome Res.*, 2005, **4**, 1330–1338.
- 9 Sunčana Moslavac, Ludwig-Maximilians-Universität, 2007.
- 10 S. Ehira and S. Miyazaki, Regulation of Genes Involved in Heterocyst Differentiation in the Cyanobacterium *Anabaena* sp. Strain PCC 7120 by a Group 2 Sigma Factor SigC, *Life*, 2015, 587–603.
- 11 S. Ehira, M. Ohmori and N. Sato, Genome-wide Expression Analysis of the Responses to Nitrogen Deprivation in the Heterocyst-forming Cyanobacterium *Anabaena* sp . Strain PCC 7120, *DNA Res.*, 2003, **113**, 97–113.
- 12 L. Tian, Q. Chen, W. Jiang, L. Wang, H. Xie, N. Kalogerakis, Y. Ma and R. Ji, A carbon-14 radiotracer-based study on the phototransformation of polystyrene nanoplastics in water versus in air †, *Environ. Sci. Nano*, , DOI:10.1039/c9en00662a.
- 13 M. Gholami, R. Mohammadi, M. Arzanlou, F. A. Dourbash, E. Kouhsari, G. Majidi, S. M. Mohseni and S. Nazari, In vitro antibacterial activity of poly ( amidoamine ) -G7 dendrimer, *BMC Infect. Dis.*, 2017, **17**, 1–11.
